# Supplementary material for: Targeted recombination between homologous chromosomes for precise breeding in tomato
Source: PubMed Central journal article supplement (PMC5458649; doi:10.1038/ncomms15605), 2017-05-26
Supplement: ncomms15605-s1.pdf [file ncomms15605-s1.pdf]

## Supplementary Information:

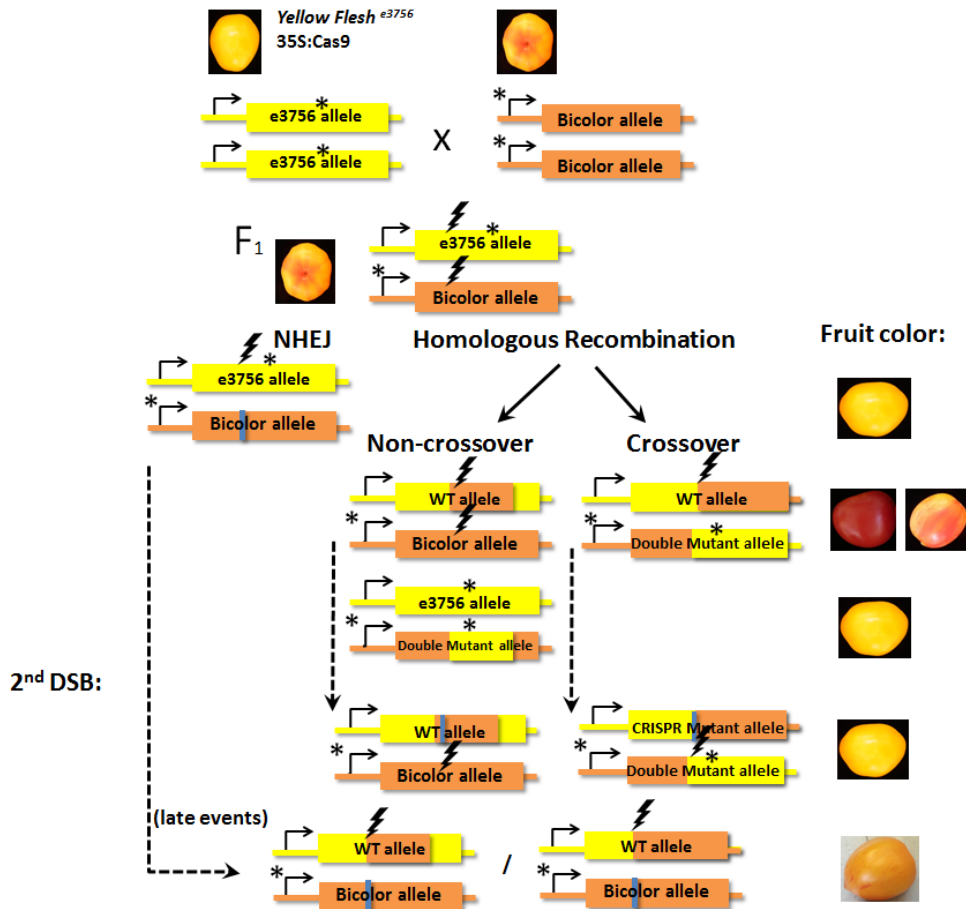

**Supplementary Figure 1 - Tomato fruit color assay and molecular analysis for possible outcomes of DNA double strand break (DSB) repair events (Extended Fig 1A).** The cross of *yellow flesh*<sup>e3756</sup> 35S:Cas9 and *bicolor*<sup>cc383</sup> u6-26:Ps#1-sgRNA is expected to give F<sub>1</sub> plants with a pale Bicolor fruit phenotype. F<sub>1</sub> plants expressing both Cas9 and gRNA were selected. The gRNA was designed for DSB induction (shown as black lightning) in both alleles between the *yellow flesh*<sup>e3756</sup> and *bicolor*<sup>cc383</sup> mutations (\*) 1086 bp from the deletion in *bicolor* and 556 bp from the *yellow flesh*<sup>e3756</sup> mutation. In case of NHEJ repair of the *bicolor*<sup>cc383</sup> allele, or of both alleles, fruit color is expected to be yellow following error-prone repair leaving indel footprints (blue line). In some of the cases of non-crossover or crossover, fruit color is expected to be red or bicolor with red spots in case of late event. Note that red fruits are shown as expected recombination products but were not found. Rather, fruits with red spots in a yellow or *bicolor* background were found and are shown (together with various putative products of HR-induced repair). In case that only one allele experienced DNA DSB, the second DNA DSB event (in dashed arrow) may be repaired independently. For example, NHEJ in the *bicolor*<sup>cc383</sup> allele can

be followed by a late event of HR-mediated DSB repair of *yellow flesh*<sup>e3756</sup>. This would give rise to yellow fruits with red spots—a phenotype that was observed. Generally, when repair via HR restored the WT allele, the CRISPR target site is still available for subsequent DSB induction. Therefore, yellow fruits may be the result of different repair mechanisms. Additional scenarios can be obtained depending on both timing and mechanism of DSB repair in each allele.

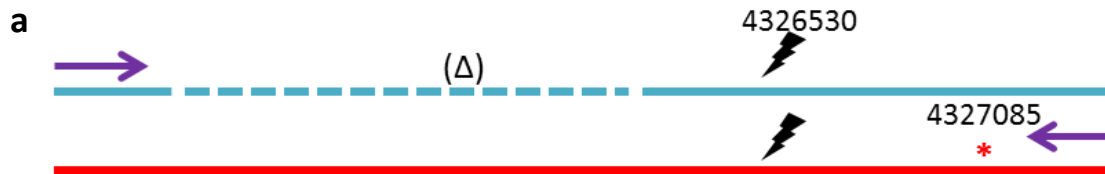

**b**

| F1 plant | Fruit number | F2 plant | Cas9 | gRNA | Yellow flesh allele (3756) | Bicolor allele (Bic) |
|----------|--------------|----------|------|------|----------------------------|----------------------|
| 1        | 1            | 11       | -    | +    |                            | Bic/4bp del          |
| 16       | 1            | 1        | +    | +    | 3756/4bp del               | T insertion          |
| 16       | 1            | 2        | -    | -    | 3756                       | T insertion          |
| 16       | 2            | 3        | +    | -    | 3756                       | T insertion          |
| 16       | 2            | 4        | -    | +    | 3756                       | T insertion          |
| 16       | 3            | 1        | +    | -    | 3756                       | T insertion          |
| 16       | 3            | 2        | +    | -    |                            | T insertion          |
| 18       | 1            | 1        | +    | +    |                            | 4bp del              |
| 18       | 1            | 4        | +    | +    | T insertion                | 4bp del              |
| 18       | 2            | 2        | +    | +    |                            | 4bp del              |
| 45       | 1            | 1        | +    | -    | 3756                       | G insertion          |
| 45       | 1            | 6        | +    | -    | 3756                       | G insertion          |
| 45       | 3            | 1        | +    | +    | 3756                       | G insertion          |
| 45       | 3            | 4        | +    | -    | 3756                       | G insertion          |
| 45       | 3            | 5        | +    | -    | 3756                       | G insertion          |

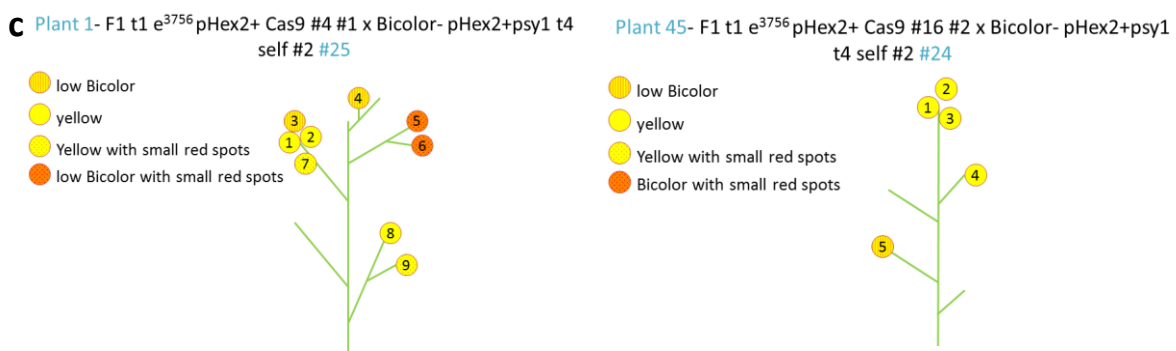

**Supplementary Figure 2 - NHEJ germinal events derived from yellow fruits.** A. *bicolor*<sup>cc383</sup> allele in blue, *yellow flesh e*<sup>3756</sup> in red, purple arrows represents primers that flanking the *bicolor* mutation and amplifying 2 PCR products in different sizes. Each product extracted from gel and then sequenced by Sanger. B. Allele specific PCR products of F<sub>2</sub> plants derived from yellow fruits of F<sub>1</sub> *yellow flesh e*<sup>3756</sup> 35S:Cas9 x *bicolor*<sup>cc383</sup> u6-26:Ps#1-sgRNA were sequenced by Sanger sequencing. All the plants

contained indels at the *bicolor* allele. 2 out of 11 contained indels in the *yellow flesh* allele as well. In some cases, the *yellow flesh* allele was not amplified due to homozygosity for *bicolor*. For some of the alleles we saw two *bicolor* alleles: the *bicolor*<sup>cc383</sup> allele and a *bicolor*<sup>cc383</sup> allele with a 4bp deletion mutation (e.g. Plant F2#11 derived from fruit#1 in F1). This apparent discrepancy between the F1 yellow fruit color and this *bicolor* genotype can be explained by independent events that occurred during the development of F1 flowers & fruits (different mutations in the maternal pericarp and ovule versus the non-mutated pollen cells as in F1 plant#1 fruit#1). C. In support of this, the fruits on F2 plant #11 were all *bicolor*. Moreover, the schematic map of F1 plant#1 shows that within some fruit clusters (as in F1 plant #1 fruit cluster 1,2,3,7) the DSB repair event seems to have occurred late, resulting in different fruit colors on the same fruit cluster. While in other clusters (as in F1 plant #16 fruit cluster 1,2,3) the DSB event seems to be early and characterized by uniform fruit phenotype and genotype. The illumina Hiseq result in Fig S3 are also supports early G insertion in F1 plant #45. . In plant F2#1 derived from F1#16 we saw 3 different alleles. This can be explained by the presence of both Cas9 and gRNA in this plant.

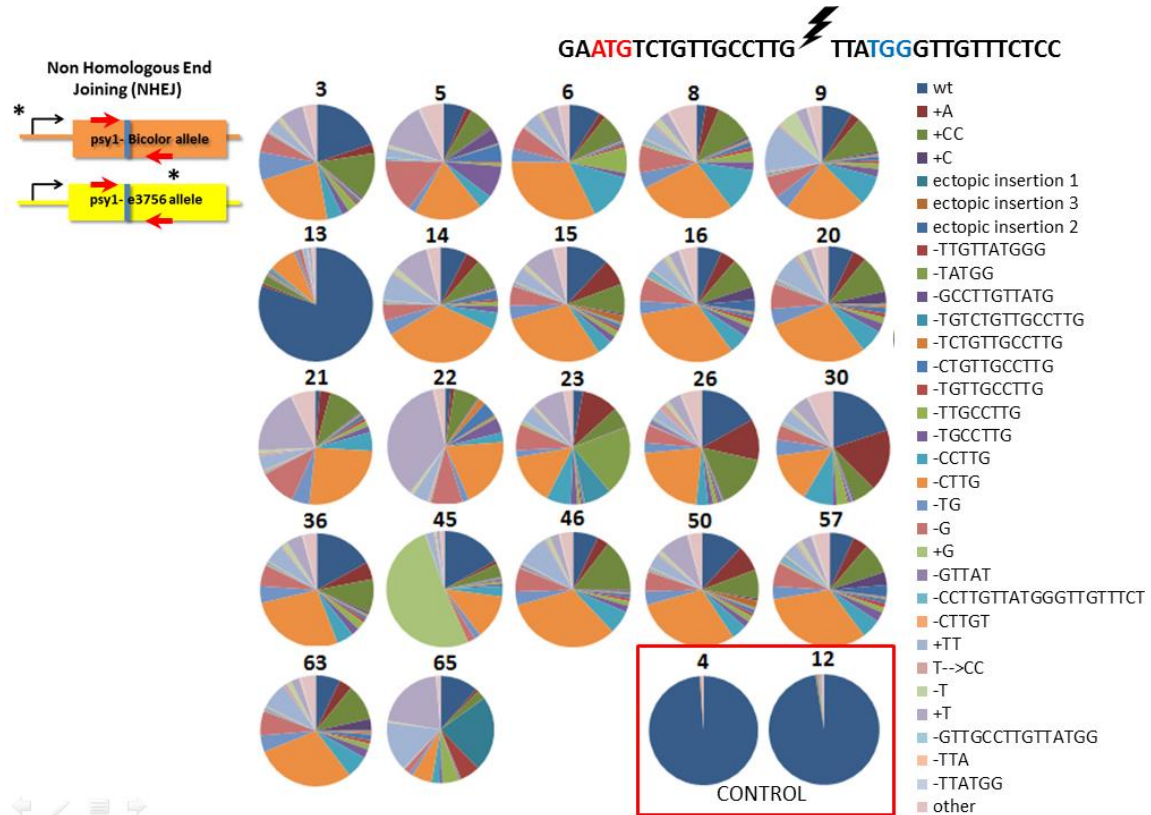

**Supplementary Figure 3 - NHEJ repair in somatic cells.** NHEJ footprints distribution in individual  $F_1$  plants and in control plants (*yellow flesh e<sup>3756</sup> x bicolor<sup>cc383</sup>*) obtained by sequencing of PCR products amplified around the CRISPR-Cas9 induced DSB (lightning) with primers shown as red arrows. Each pie represents the total illumina Hiseq reads for single plant (250,000-850,000 reads per plant).

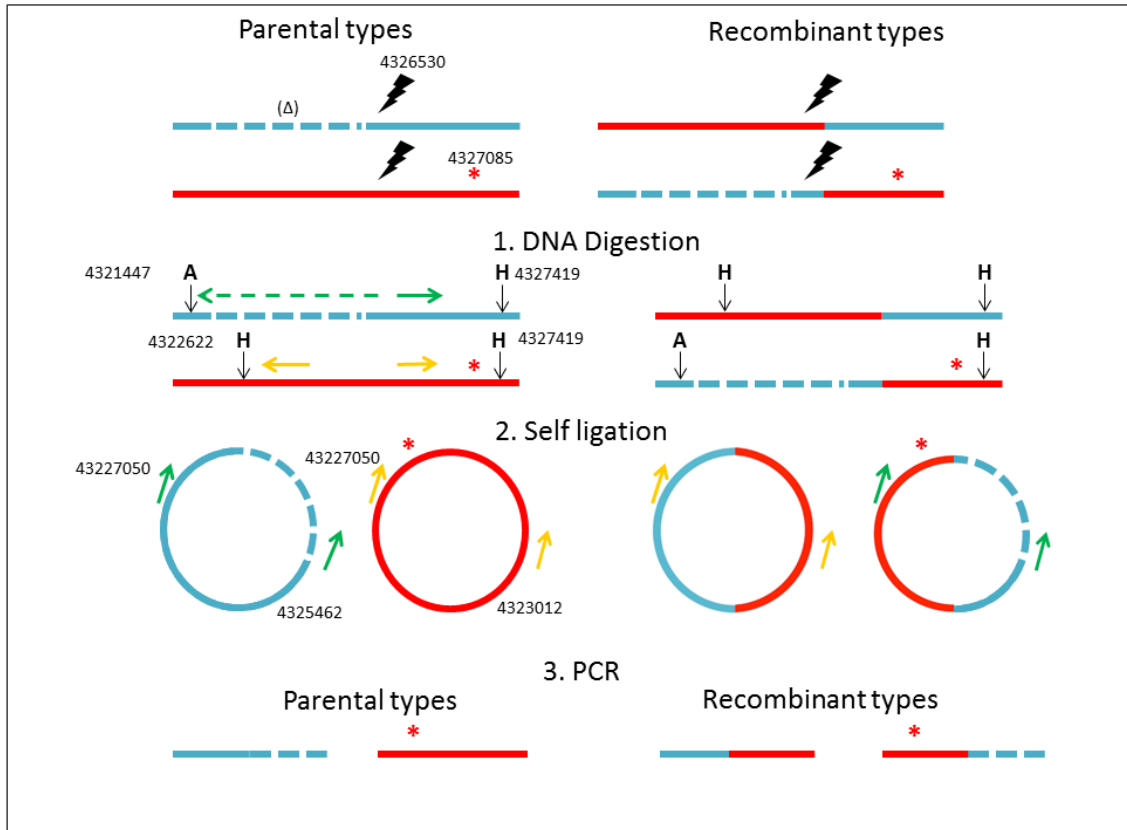

**Supplementary Figure 4 - Inverse PCR detailed scheme for identification of recombinant DNA fragments.** The specific coordinates of *bicolor*<sup>cc383</sup> and *yellow flesh* *e*<sup>3756</sup> mutation and of DNA DSB site on tomato chromosome 3 are listed above the *bicolor*<sup>cc383</sup> and *yellow flesh* *e*<sup>3756</sup> parental types alleles. (1) DNA from separate leaves samples was first digested with Apal(A) and HindIII(H) and then blunted. The coordinates of Apal(A) and HindIII(H) are listed next to the relevant restriction sites. (2) Each sample was self-ligated. (3) Each sample was amplified by two different primer sets shown as green and yellow arrows. Primers coordinates are listed next to each primer; for primer sequences see primers list). The reverse primers are designed specifically for each allele: The green dashed arrow represents a *bicolor*-specific primer that spans both sides of the deletion (hence the dashed line), The Yellow reverse primer is specific to the *yellow flesh* *e*<sup>3756</sup> allele because it is inside the region that corresponds to the deletion in *bicolor*. Blue- *Bicolor* allele; red- *Yellow flesh* allele; Dashed blue line- *Bicolor* deletion, \*- *Yellow flesh* mutation, lightning- DSB site.

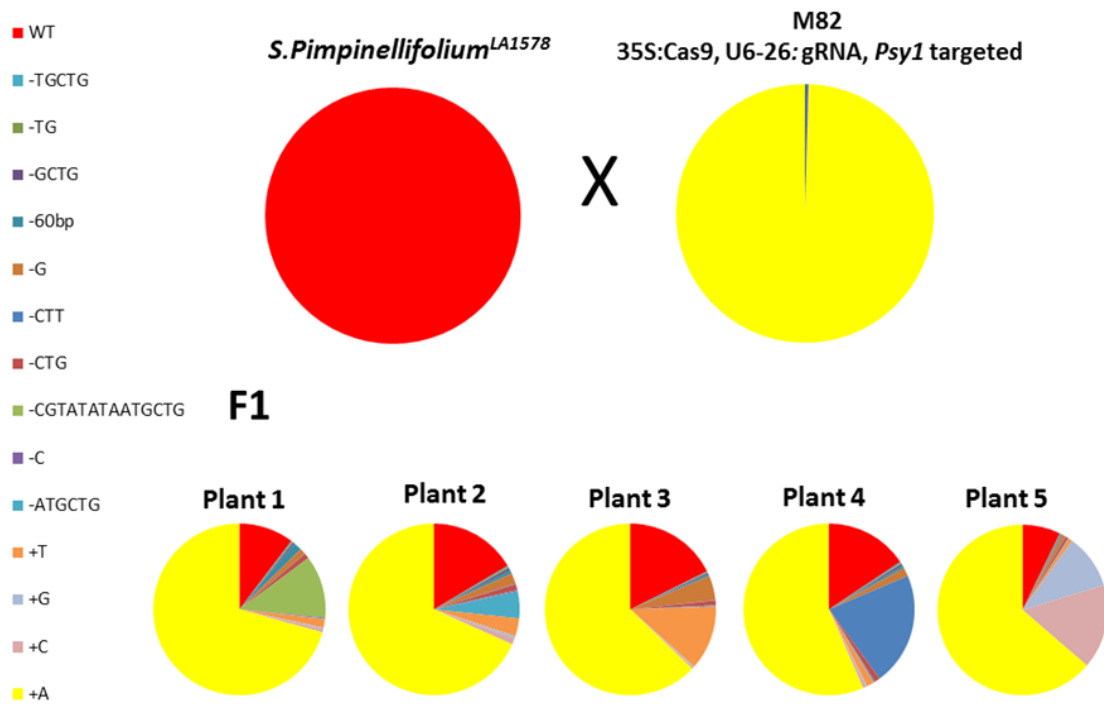

**Supplementary Figure 5 - Tomato SNPs assay for allele-specific DNA DSB repair-** DNA was extracted from 4 leaves of M82 35S:Cas9 u6-26:Ps#2-sgRNA *psy1<sup>+A</sup>/psy1<sup>+A</sup>*, *S. pimpinellifolium<sup>LA1578</sup>* and 5 plants of their F<sub>1</sub> inbred. illumina sequencing was preformed and each pie represent a summary of 600,000-900,000 reads per plant.

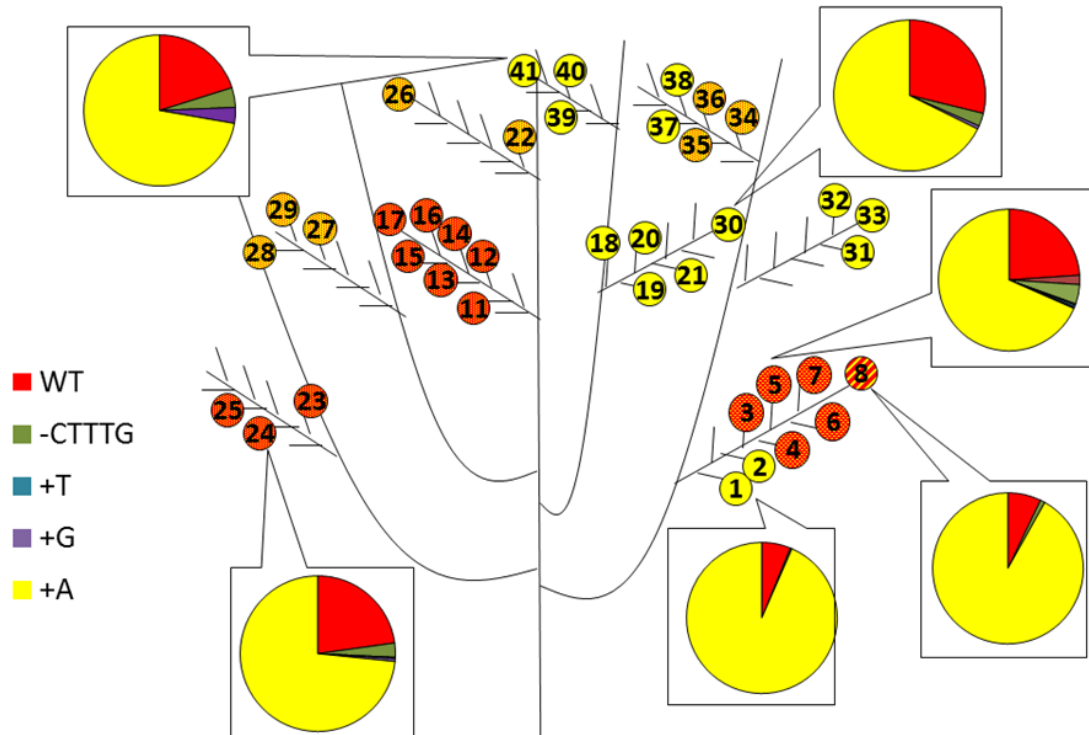

**Supplementary Figure 6 - A schematic map of Fruit color phenotypes** throughout development and sequencing of DNA DSB repair footprints from fruit pericarp tissues using illumina sequencing. An example is shown for plant#1, which is a F<sub>1</sub> plant of M82 35S:Cas9 u6-26:Ps#2-sgRNA *psy1*<sup>+A</sup>/*psy1*<sup>+A</sup> x *S. pimpinellifolium*<sup>LA1578</sup>. Fruit color phenotype was variable from red through red with small or big yellow sectors to yellow. Each pie was built out of 15,000-50,000 illumina sequencing reads per fruit.



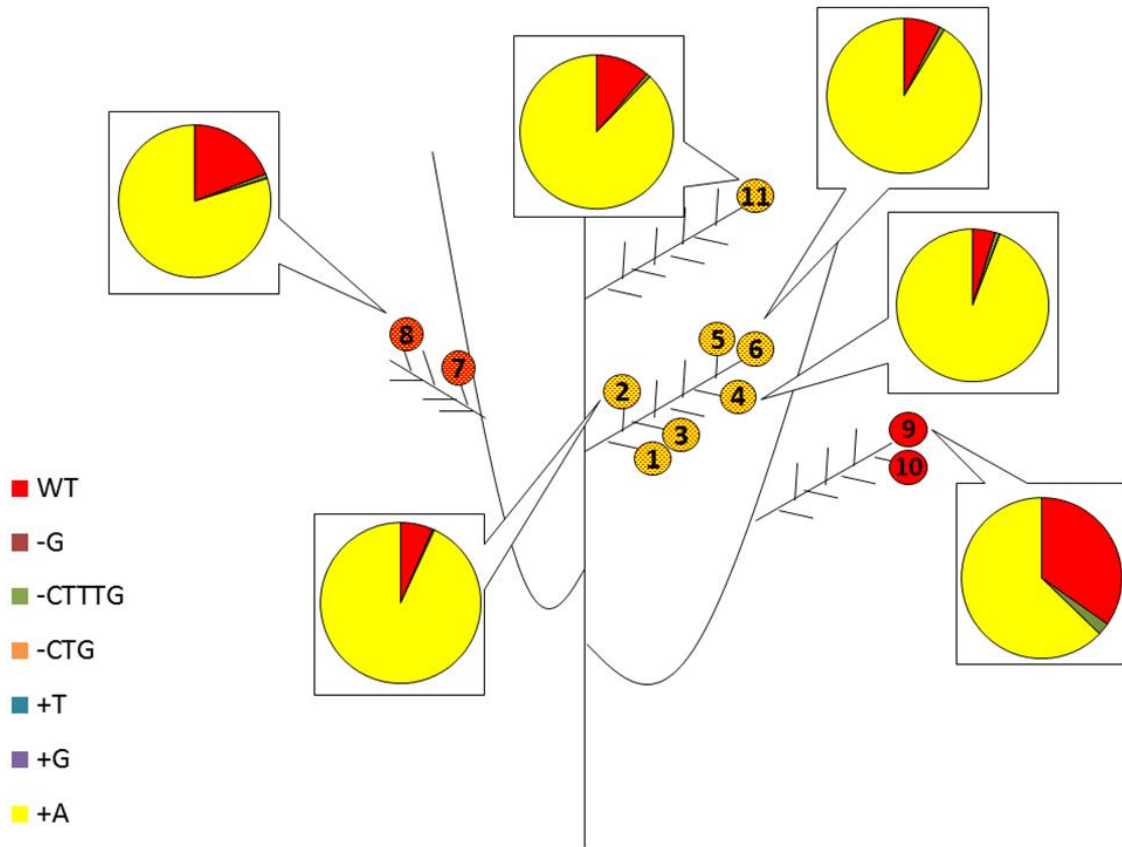

**Supplementary Figure 7 - DNA DSB repair event** followed by fruit phenotype and pericarp specific illumina sequencing- plant#2. All details are similar to figure S6. This plant showed high level of *psy1*<sup>+A</sup>. The conversion products in figure 2B are the progeny of this plant.

**Supplementary Table 1- Primers list:**

| <b>Primers for sgRNA targets:</b>                                      |                                           |
|------------------------------------------------------------------------|-------------------------------------------|
| <b>Ps#1 sgRNA F</b>                                                    | attgGAATGTCTGTTGCCTTGTTA                  |
| <b>Ps#1 sgRNA R</b>                                                    | aaacTAACAAGGCAACAGACATT                   |
| <b>Ps#2 sgRNA F</b>                                                    | attgGAGCGTATATAATGCTGCTT                  |
| <b>Ps#2 sgRNA R</b>                                                    | aaacAAGCAGCATTATATACGCT                   |
| <b>Primers for inverse PCR HR detection (allele specific primers):</b> |                                           |
| <b>a 3756 bic hr f</b>                                                 | tcagCTATGCTAATGACTCCCGAG                  |
| <b>a bic hr r</b>                                                      | agtcCATTCTCTATTCCGCATAGTGA                |
| <b>a 3756 r</b>                                                        | tgacAACCGACCTAAATCGATCCG                  |
| <b>b bic hr r</b>                                                      | actgCATTCTCTATTCCGCATAGTGA                |
| <b>b 3756 r</b>                                                        | gactactgAACCGACCTAAATCGATCCG              |
| <b>Primers for synthetic crossover - control plasmids :</b>            |                                           |
| <b>pupd_y1_f</b>                                                       | gcgccgtctcgctcgactCGAACGAGGGTCATC         |
| <b>pupd_y1_r</b>                                                       | gcgccgtctcgctcgagcgCCATAATTGGAACACTCATCAA |
| <b>pupd_ps_f</b>                                                       | gcgccgtctcgctcgggagCAACCTTATTTTGTACTT     |
| <b>pupd_ps_r</b>                                                       | gcgccgtctcgctcgagtaCAACATATCAAATAGGTAT    |
| <b>Primers for NHEJ High throughput sequencing</b>                     |                                           |
| <b>psy1 t1 htp f</b>                                                   | GGTTTGCCTGTCTGTGGTCT                      |
| <b>psy1 t1 htp r1</b>                                                  | agtcCCATGAAACTTGTCACATTTG                 |
| <b>psy1 t1 htp r2</b>                                                  | tcagCCATGAAACTTGTCACATTTG                 |
| <b>psy1 t1 htp r3</b>                                                  | actgCCATGAAACTTGTCACATTTG                 |
| <b>psy1 t1 htp r4</b>                                                  | tgacCCATGAAACTTGTCACATTTG                 |
| <b>psy1 t1 htp r5</b>                                                  | gactCCATGAAACTTGTCACATTTG                 |
| <b>psy1 t1 htp r6</b>                                                  | ctgaCCATGAAACTTGTCACATTTG                 |
| <b>nhej_psy1_t2_r</b>                                                  | GCCTAAATACGGCACTTCCA                      |
| <b>a_nhej_psy1_t2_f</b>                                                | agtcGTATCGCCCCTGAATCAAAG                  |
| <b>b_nhej_psy1_t2_f</b>                                                | tcagGTATCGCCCCTGAATCAAAG                  |
| <b>c_nhej_psy1_t2_f</b>                                                | tgacGTATCGCCCCTGAATCAAAG                  |
| <b>d_nhej_psy1_t2_f</b>                                                | actgGTATCGCCCCTGAATCAAAG                  |
| <b>e_nhej_psy1_t2_f</b>                                                | gactGTATCGCCCCTGAATCAAAG                  |
| <b>f_nhej_psy1_t2_f</b>                                                | ctgaGTATCGCCCCTGAATCAAAG                  |
| <b>nnn_a_nhej_psy1_t2_f</b>                                            | nnnnnagtcGTATCGCCCCTGAATCAAAG             |
| <b>nnn_b_nhej_psy1_t2_f</b>                                            | nnnnntcagGTATCGCCCCTGAATCAAAG             |
| <b>nnn_nhej_psy1_t2_r</b>                                              | nnnnnngcctAAATACGGCACTTCCA                |
| <b>Primers for Sanger sequencing of psy1 allele (SNPs detection)</b>   |                                           |
| <b>PSY1_1_F</b>                                                        | tttgcagaagtcaagaaacagg                    |
| <b>PSY1_t4_ident_R</b>                                                 | gatgtcatctccgttctcc                       |
| <b>PSY1_psnps F</b>                                                    | acggatcttcccaccttca                       |
| <b>PSY1_psnps R2</b>                                                   | atagtgtaattgttaggctcctt                   |

|                                                                              |                           |
|------------------------------------------------------------------------------|---------------------------|
| PSY1 psnps F2                                                                | cgacgaggagtaaggttgc       |
| PSY1 psnps R                                                                 | tcagtccatttcgtttcgt       |
| psy1_t123_f                                                                  | atgttgagccattcagaga       |
| psy1_t123_r                                                                  | tgatcatggctcgtcactgt      |
| psy1 term f                                                                  | acaagtaccctgggttgag       |
| psy1_term_r2                                                                 | gcagttttgtaggaggaca       |
| psy1_term_f2                                                                 | tgtgcctctacaaaaactgc      |
| psy1 term r                                                                  | tggattgaatcgaattggataa    |
| pimpixm82_co_f                                                               | ctttgacttggttactcaga      |
| pb_psy1_r                                                                    | agcctacggcccaaactatt      |
| 14036_f                                                                      | tgctaattggggcaggaaata     |
| 14036_r                                                                      | tcaagtaacgtaaaacacgttgaaa |
| 5kb_up_t2_F                                                                  | ttcatttgacgagcgatctg      |
| 5kb_up_t2_R                                                                  | tggctgctttgacctacc        |
| 40kb_down_t2_f                                                               | cattatcctaagagtgcagtcagc  |
| 40kb_down_t2_r                                                               | tggtttctcgattacctttca     |
| 20kb_down_t2_f                                                               | tgacaccaatccatccaatc      |
| 20kb_down_t2_r                                                               | ctgctacctgcactggctct      |
| 20kb_up_t2_f                                                                 | tacgtccccgaagaaatcac      |
| 20kb_up_t2_r                                                                 | cccttaggctccgaagtgt       |
| 40kb_up_t2_f                                                                 | cacataagaggacacgtttattca  |
| 40kb_up_t2_r                                                                 | gccacggagaaaatagttga      |
| <b>Primers for NHEJ germinal events estimation (allele specific bends*):</b> |                           |
| JF_F                                                                         | tgcaaagtgctacgtgtcct      |
| PSY1_1_R                                                                     | aatgtgaacagcaacgcaaa      |

\* This set of primers give 2 bends. We extracted each of them from gel and sequence.

## Supplementary Note 1 - Plasmids list:

Plasmids for Tomato fruit color assay:

### 35S:Cas9 plasmid:

CaMV35S, atCas9, OCS terminator

>

```
GGGGACAAGTTTGTACAAAAAAGCAGGCTATGGATCCCGGGATCATCTACTTCTGAAGACTCAGACTCAGACTAAGCAGGTGAC
GAACGTCACCAATCCCAATTCGATCTACATCGATAAGAAGTACTCTATCGGACTCGATATCGGAACTAAGTCTGTGGGATGGGCTG
TGATCACCGATGAGTACAAGGTGCCATCTAAGAAGTTCAAGTTCTCGGAAACACCGATAGGCACTCTATCAAGAAAAACCTTAT
CGGTGCTCTCTCTCGATTCTGGTGAAGTCTGAGGCTACCAGACTCAAGAGAACCCTAGAGAAGGTACACCAGAAGAAAG
AACAGGATCTGCTACCTCCAAGAGATCTCTCTAACGAGATGGCTAAAGTGGATGATTCTTCCACAGGCTCGAAGAGTCATT
CCTCGTGGAAAGAAGATAAGAAGCACGAGAGGCCCTATCTTCGGAACATCGTTGATGAGGTGGCATAACCAGAGAAGTACCC
TACTATCTACCCTCAGAAAAGAAGCTCGTTGATTCTACTGATAAGGCTGATCTCAGGCTCATCTACCTCGCTCTCGCTCATGAT
CAAGTTCAGAGGACATCTCTCATCGAGGGTATCTCAACCTGATAACTCTGATGTGGATAAGTTGTTTCCAGCTCGTGAGAG
CCTACAACCAGCTTTTCGAAGAGAACCCTATCAACGCTTCAGGTGTGGATGCTAAGGCTATCCTCTCTGCTAGGCTCTCTAAGTCAA
GAAGGCTTGAGAACCTCATTGCTCAGCTCCCTGGTGAAGAAGAAGCGGACTTTTCGAAACTTGATCGCTCTCTCTCGGACTC
ACCCCTAACTTCAAGTCAACTTCGATCTCGCTGAGGATGCAAAGCTCCAGCTCTCAAAGGATACCTACGATGATGATCTCGATAA
CCTCCTCGCTCAGATCGGAGATCAGTACGCTGATTGTTCTCCTCGCTGTAAGAACCTCTCTGATGCTATCCTCCTCAGTGATACCTC
AGAGTGAACACCGAGATACCAAGGCTCCACTCTCAGCTTCTATGATCAAGAGATACGATGAGCACCACAGGATCTCACACTTCT
CAAGGCTCTTGTTAGACAGCAGCTCCAGAGAAGTACAAAGAGATTTTCTTCGATCAGTCTAAGAACGGATACGCTGGTTACATC
GATGGTGGTGATCTCAAGAAGAGTTCTACAAGTTTCAAGCTATCCTCGAGAAGATGGATGGAACCGAGGAACTCCTCGTGA
AGCTCAATAGAGAGGATCTTCTCAGAAAGCAGAGGACCTTCGATAACGATCTATCCCTCATCAGATCCACTCGGAGAGTTGCA
CGCTATCCTTAGAAGGCAAGAGGATTTCTACCCATTCTCAAGGATAACAGGAAAAGATTGAGAAGATTCTCACCTCAGAATCC
CTTACTACGTGGGACCTCTCGCTAGAGGAACTCAAGATTCGCTTGATGACCAGAAAGTCTGAGGAAACCATCACCCCTGGAA
CTTCAAGAGGTTGGTGATAAGGGTGTAGTCTCAGTCTTTCATCGAGAGGATGACCAACTTCGATAAGAACCTTCAAACGAG
AAGGTGCTCCCTAAGCACTCTTGTCTACGAGTACTTCACCGTGTACAACGAGTTGACCAAGGTTAAGTACGTGACCGAGGGAAT
GAGGAAGCCTGCTTTTTGTGAGGTGAGCAAAAGAAGGCTATCGTTGATCTTGTTCAGACCAACAGAAAGGTGACCGTGAAG
CAGCTCAAAGAGGATTACTTCAAGAAAATCGAGTGCTTCGATTCAGTTGAGATTCTGGTGTGAGGATAGGTTCAACGCATCTCT
CGGAACCTACCAGATCTCCTCAAGATCATTAAAGGATAAGGATTTCTGGATAACGAGGAAAACGAGGATATCTGGAGGATATC
GTTCTTACCCTCACCTCTTTGAAGATAGAGAGATGATTGAAGAAAGGCTCAAGACCTACGCTCATCTCTCGATGATAAGGTGAT
GAAGCAGTTGAAGAGAAGAAGATACACTGTTGGGGAAGGCTCTCAAGAAAGCTCATTAAACGGAATCAGGGATAAGCAGTCTG
GAAAGACAATCCTTGATTTCTCAAGTCTGATGGATTGCTAACAGAAACTTCATGAGCTCATCCAGATGATTCTCTCACCTTTA
AAGAGGATATCCAGAAGGCTCAGGTTTCAGGACAGGGTATAGTCTCCATGAGCATATCGCTAACCTCGCTGGATCTCTGCAAT
CAAGAAGGGAATCCTCCAGACTGTGAAGGTTGTGGATGAGTTGGTGAAGGTGATGGGAAGGCATAAGCCTGAGAACATCGTGA
TCGAAATGGCTAGAGAGAACCAGACCACTCAGAAGGGACAGAAGAACTTAGGGAAGGATGAAGAGATCGAGGAAGGTATC
AAAGAGCTGGATCTCAGATCCTCAAAGAGCACCTGTTGAGAACACTCAGCTCCAGAATGAGAAGCTCTACCTCTACTACCTCCA
GAACGGAAGGGATATGATGTGGATCAAGAGTTGGATATCAACAGGCTCTCTGATTACGATGTTGATCATATCGTGCCACAGTCA
TTCTGAAGGATGATTCTATCGATAACAAGGTGCTCACAGGCTGATAAGAACAGGGGTAAGAGTGATAACGTGCCAAGTGAA
GAGGTTGTGAAGAAAATGAAGAACTATTGGAGGCAGCTCCTCAAGCTAAGCTCATCACTCAGAGAAAAGTTGATAAAGTACTGACTA
AGGCTGAGAGGGGAGGACTCTCTGAATTGGATAAGGCAAGGATTCATCAAGAGGCAGCTTGTGGAAACAGGCGAGATCACTAAG
CAGTTGCACAGATCTCGATTCTAGGATGAACACCAAGTACGATGAGAACGATAAGTTGATCAGGGAAGTGAAGGTTATCACCC
TCAAGTCAAAGCTCGTGTCTGATTTTCAGAAAGGATTTCCAATTCTACAAGGTGAGGGAAAATCAACAACCTACCACCGCTCAGAT
GCTTACCTTAAAGCTGTTGTTGGAACCGCTCTCATCAAGAAGTATCCTAAGCTCAGTCTCAGAGTTGTTGATACGGTATTACAAGG
GTACGATGTGAGGAAGATGATCGTAAGTCTGAGCAAGAGATCGGAAAGGCTACCGCTAAGTATTTCTTACTACTAACATCATG
AATTTCTCAAGACCGAGATTACCCTCGTAACGGTGAGATCAGAAGAGGCACTCATCGAGACAAACGGTGAACAGGTGAG
ATCGTGTGGGATAAGGGAAGGATTTCTGCTACCGTTAGAAAGGTGCTCTATGCCACAGGTGAACATCGTTAAGAAAACCGAG
GTGCAGACCGGTGATTCTCAAGAGTCTATCCTCCCTAAGAGGAACTCTGATAAGCTCATTGCTAGGAAGAAGGATTGGGACC
```

CTAAGAAATACGGTGGTTTCGATTCTCCTACCGTGGCTTACTCTGTTCTCGTTGTTGGCTAAGGTTGAGAAGGGAAAGAGTAAGAA  
GCTCAAGTCTGTTAAGGAACTTCTCGGAATCACTATCATGGAAGGTCATCTTTCGAGAAGAACCCAATCGATTTCTCGAGGCTA  
AGGGATACAAAGAGGTTAAGAAGGATCTCATCATCAAGCTCCAAAGTACTCACTCTTGAAGTACGTTAACTTTCTTACCTCGTTCTCACTA  
GCTCGTCTGCTGGTGAGCTTCAAAGGGAAACGAGCTTCTCCATCTAAGTACGTTAACTTTCTTACCTCGTTCTCACTA  
CGAGAAGTTGAAGGGATCTCCAGAAGATAACGAGCAGAAGCAACTTTTCGTTGAGCAGCACAAGCACTACTTGGATGAGATCAT  
CGAGCAGATCTCTGAGTTCTCTAAAAGGGTGATCCTCGTGATGCAAACCTCGATAAGGTTGTCTGCTTACAACAAGCACAGA  
GATAAGCCTATCAGGGAAACAGGCAGAGAACATCATCCATCTTTCACCCCTACCAACCTCGGTGCTCTGCTGCTTTCAAGTACTTC  
GATAACAACCATCGATAGGAAGAGATACACCTCTACCAAAGAAGTGCTCGATGCTACCCTCATCCATCAGTCTATCACTGGACTCTA  
CGAGACTAGGATCGATCTCTCACAGCTCGGTGGTATTCAAGGGCTGATCCTAAGAAGAAGAGGAAGGTTGAACCCAGCTTTCT  
TGTAACAAGTGGGGTTCGAAATCGATAAGCTTGATCCTCTAGAATCCTGCTTAAATGAGATATGCGAGACGCCATGATCGCA  
TGATATTTGCTTCAATTTCTGTTGTCACGTTGTAACAACTGAGCATGTGTAGCTCAGATCCTTACCCCGGTTTCGTTTCACTT  
AATGAATATATCACCGTACTATCGATTTTTATGAATAATTTCCGTTCAATTTACTGATTGACCTACTACTTATATGTACAA  
TATTAATAATGAAAACAATATATTGCTGAATAGGTTTATAGCGACATCTATGATAGAGCGCCACAATAACAAACAATTGCGTTTT  
ATTATTACAAATCCAATTTAAAAAAGCGGCAGAACCGGTCAAACCTAAAAGACTGATTACATAAATCTTATTCAAATTTCAAAA  
GGCCCCAGGGGCTAGTATCTACGACACACCGAGCGGCGAACTAATAACGTTCACTGAAGGGAACTCCGGTCCCCGCGGCGCG  
CATGGGTGAGATTCTTGAAGTTGAGTATTGGCCGTCGCTCTACCGAAAGTTACGGGCACCATTCAACCCGGTCCAGCACGGCG  
GCCGGTAAACCGACTTGTCTGCCCGAGAATTATGCAGCATTTTTTGGTGTATGTGGGCCCAAATGAAGTGCAGGTCAAACCTT  
GACAGTGACGACAAATCGTTGGGCGGTCAGGGCGAATTTGCGACAACATGTCGAGGCTCAGCAGACCTGACGGCATGCAA  
GCTAGCTTACTAGTGATGCATATTCTATAGTGTACCTAAATCTGCGGCCGACTAGTGATATCCCGCGCCATGCGCGCCGGGA  
GCATGCGACGTCGGGCCAATTCGCCCTATAGTGAGTCGTATTACAATTCCTGCGCGTCTTTTACAACGTCGTGACTGGGAAAA  
CCCTGGCGTACCCAATTAATCGCCTTGACGACATCCCCCTTTCGCGAGCTGGCGTAATAGCGAAGAGGCCCGCACCGATCGCC  
CTTCCAAACAGTTGCGCAGCTGAATGGCGAATGGAATTTAAACGTTAATGGGTTTCTGGAGTTTAAATGAGCTAAGCACATAC  
GTCAGAAACCATTATTGCGGTTCAAAGTTCGCTAAGGTCATCTCAGCTAGCAAATATTTCTGTCAAAAATGCTCCACTGACGT  
TCCATAAATTCCTCGGTATCCAATTAGAGTCTCATATCACTCTCAATCAAATAATCTGCAATGGCAATTACCTTATCCGCAACT  
TCTTTACCTATTTCCGCCCGATCCGGGCGAGTTCTCCGGCGCTTGGGTGGAGAGGCTATTCCGGCTATGACTGGGCACAACAGA  
CAATCGGCTGCTGTATGCCGCGTGTCCGGCTGTCAGCGCAGGGGCGCCCGTCTTTTTGTCAAGACCGACCTGTCCGGTGGC  
CTGAATGAAGTGCAGGACGAGGCGAGCGCGCTATCGTGGCTGCCACGACGGGCGTTCCTTGCAGCTGTGCTCGACGTTGTC  
ACTGAAGCGGGAAGGACTGGCTGTATTGGCGAAGTGCCGGGCGAGATCTCTGTATCTCACCTTGTCTGCGGAGAAA  
GTATCCATCATGGCTGATGCAATGCGGCGGCTGCATACGCTTATCGGCTACCTGCCATTGACCACCAAGCGAAACATCGCAT  
CGAGCGAGCACGTACTCGGATGGAAGCCGGTCTTGTGATCAGGATGATCTGACGAAGAGCATCAGGGGCTCGCGCCAGCCGA  
ACTGTTCCGAGGCTCAAGGCGCGCATGCCGACGCGGAGGATCTCGTGTGACCCATGGCGATGCTGCTTCCGAATATCATG  
GTGGAAAATGGCCGCTTTTCTGGATTATCGACTGTGGCCGCTGGGTGTGGCGGACCGCTATCAGGACATAGCGTTGGCTACCC  
GTGATATTGCTGAAGAGCTTGGCGGCAATGGGCTGACCGCTTCTCGTGCTTTACGGTATCGCCGCTCCCGATTGCGAGCGCATC  
GCCTTCTATCGCCTTCTGACGAGTTCTTCTGAGCGGGACTCTGGGGTTCGAAATGACCGACCAAGCGACGCCAACCTGCCATCA  
CGAGATTTGATTCCACCGCCGCTTCTATGAAAGGTTGGGCTTGGAAATCGTTTTCCGGGACGCCGGTGGATGATCTCCAGCG  
CGGGGATCTCATGCTGGAGTTCTTCCGCCACCCGATCCAACACTTACGTTTGAACGTCGAAGAGCAAATAGACCACGAACGCCG  
GAAGGTTGCCGAGCGTGTGGATTGCTCTCAATTTCTTTCGAGGAATGCAATGATGAATATGATACTGACTATGAACTTTGA  
GGGAATACTGCCTAGCACCGTCACTCATAACGTGCATCATGCATGCCCTGACAACATGGAACATCGCTATTTTTCTGAAGAATTA  
TGCTCGTTGGAGATGTCGCGCAATTGCAGCTATTGCAACATGAACTACCCCTCACGATGCATTATCAATATTATTCATGCG  
GGGAAAGCAAGATTAATCCAATGCAATCATCCAGCGTATTGGTAACTTCACTTCCAGCGACTGATTGTTTTGGTGCTAC  
CCACGTTTTCAATAAGGACGAGATGGTGGAGTAAAGAAGGAGTGGCTGGAAGCAGATCGTTCAAACATTTGGCAATAAAGTTTCT  
TAAGATTGAATCCTGTTGCCGCTTTCGATGATTATCATATAATTTCTGTTGAATTACGTTAAGCATGTAATAATTAACATGTAAT  
GCATGACGTTATTTATGAGATGGGTTTTATGATTAGAGTCCCGCAATTATACATTAATACCGCATAGAAAACAAAATATAGCGC  
GCAAACCTAGGATAAATATCGCGCGCGGTGCATCTATGTTACTAGATCGAATTAATCAGTACATTAATAAACCTCCGCAATGTG  
TATTAAGTTGTCTAAGCGTCAATTTGTTACACCACAATATATCCTGCCACCAGCCAGCCAACAGCTCCCCACCGGCGAGCTCGGCA  
CAAAATCACCCTCGATACAGGCGAGCCCATCAGTCCGGGACGCGCTCAGCGGGAGAGCCGTTGTAAGGCGGACACTTTGCTCA  
TGTTACCGATGCTATTCGGAAGAACGGCAACTAAGCTGCCGGTTTGAACACGGATGATCTCGGAGGGTAGCATGTTGATTG  
TAACGATGACAGAGCGTTGCTGCTGTGATCAAATATCATCTCCCTCGCAGAGATCCGAATATCAGCCTTCTTATTCATTTCTCGC  
TTAACCGTGACAGGCTGTGATCTTGAAGACTATGCCGACATAATAGGAAATCGCTGGATAAAGCCGCTGAGGAAGCTGAGTGG  
CGTATTTCTTGAAGTGAACGTTGACGATGTCGACGGATCTTTCCGCTGCATAACCTGCTTCCGGGTCATTATAGCGATTTTT  
TCGGTATATCCATCTTTTTCGCACGATATACAGGATTTGCCAAAGGGTTCGTGTAGACTTTCCTTGGTGTATCCAACGGCGTCAG

CCGGCAGGATAGGTGAAGTAGGCCACCCGCGAGCGGGTGTTCCTTCTCACTGTCCCTATTTCGCACCTGGCGGTGCTCAACG  
GGAATCCTGCTCTGCGAGGCTGGCCGCTACCGCCGCGTAACAGATGAGGGCAAGCGGATGGCTGATGAAACCAAGCCAACCA  
GGGGTGATGCTGCCAACTACTGATTTAGTGTATGATGGTGTITTTGAGGTGCTCCAGTGGCTTCTGTTTCTATCAGCTGTCCCTCC  
TGTTCACTACTGACGGGGTGGTGCCTAACGGCAAAAGCACCGCCGACATCAGCGCTATCTCTGCTCTCACTGCCGTAAAAAT  
GGCAACTGCAGTTCACCTACACCGCTTCAACCCGGTACGCACCCAGAAAATCATTGATATGGCCATGAATGGCGTTGGATGCCG  
GGCAACAGCCCGCATTATGGGCGTTGGCTCAACAGATTTTACGTCACTTAAAAAACTCAGGCCGCGAGTCGTAACCTCGCGCAT  
ACAGCCGGGCGAGTGCATCGTCTGCGCGAAATGGACGAACAGTGGGCTATGTGCGGGCTAAATCGCGCCAGCGCTGGCT  
GTTTTACGCGTATGACAGTCTCCGGAAGACGGTGTGGTGGCAGTATTCCGTGAACGCACTATGGCGACGCTGGGGCGTCTTATG  
AGCCTGCTGTACCCCTTTGACGTGGTGTATGGATGACGGATGGCTGGCCGCTGTATGAATCCCGCCTGAAGGGAAAGCTGCACG  
TAATCAGCAAGCGATATACGCAGCGAATTGAGCGGCATAACCTGAATCTGAGGCAGCACCTGGCACGGCTGGGACGGAAGTCGC  
TGTCGTTCTCAAATCGGTGGAGCTGCATGACAAAGTATCGGGCATTATCTGAACATAAAACACTATCAATAAGTTGGAGTCATT  
ACCAACAGGAAGGGCAGCCACCTATCAAGGTGTACTGCTTCCAGACGAACGAAGAGCGATTGAGGAAAAGGCGGCGCG  
GCCGGCATGAGCCTGTGCGCCTACCTGTGGCCGTGCGCCAGGGCTACAAAATCACGGGCGTCTGGACTATGAGCACGTCCGC  
GAGCTGGCCGCATCAATGGCGACCTGGCCGCTGGGCGGCTGTGAAACTCTGGCTCACCGACGCCGCGCACGGCGCGG  
TTCGGTGATGCCACGATCCTCGCCCTGTGGCGAAGATCGAAGAGAAGCAGGACGAGCTTGCAAGGTCATGATGGGCGTGGT  
CGCCGAGGGCAGAGCCATGACTTTTTAGCCGCTAAAACGGCCGGGGGGTGGCGGTGATTGCCAAGCACGTCCCATGCGCTCC  
ATCAAGAAGAGCGACTTCGCGGAGCTGTTATCGTGCAGGGCAAGATTCGGAATACCAAGTACGAGAAGGACGGCCAGACGGT  
CTACGGGACCGACTTCATTGCCGATAAGGTGGATTATCTGGACCAAGGCACCAGCGGGTCAAATCAGGAATAAGGGCACAT  
TGCCCCGGCGTGAGTCGGGGCAATCCCGCAAGGAGGGTGAATGAATCGGACGTTTGACCGGAAGGCATACAGCAAGAAGTGA  
TCGACGCGGGGTTTTCCGCGGAGGATGCCGAACCATCGCAAGCCGACCGTCATGCGTGCGCCCGCAAACTTCCAGTCCGT  
CGGCTCGATGTTCCAGCAAGCTACGGCCAAGATCGAGCGCACAGCGTCAACTGGCTCCCCCTGCCCTGCCGCGCATCGGCC  
GCCGTGGAGCGTTCGCGTCTCGAACAGGAGCGGCGAGTTGGCGAAGTCGATGACCATCGACACGCGAGGAAGTATGAG  
ACCAAGAAGCGAAAAACCGCCGCGAGGACCTGGCAAAACAGTTCAGCGAGGCCAAGCAGGCCGCGTTGCTGAAACACACGAA  
GCAGCAGATCAAGGAAATGCAGCTTCTTGTTCGATATTGCGCGTGGCCGACACGATGCGAGCGATGCCAAACGACACGGC  
CCGCTCTGCCCTGTTACCACGCGCAACAAGAAAATCCCGCGGAGGCGCTGCAAAACAAGGTCATTTTCCACGTCAACAAGGAC  
GTGAAGATCACCTACCCGCGTGCAGCTGCGGGCCGACGATGACGAACTGGTGTGGCAGCAGTGTGGAGTACGCGAAGCG  
CACCCCTATCGCGAGCCGATCACCTTACGTTCTACGAGCTTCCAGGACCTGGGCTGGTGCATCAATGGCCGGTATTACACGA  
AGGCGAGGAATGCTGTGCGCCTACAGGCGACGGCGATGGCTTCCAGTCCGACCGCGTTGGCACCTGGAATCGGTGTCGC  
TGCTGCACCGCTTCCGCGTCTGGACCGTGGCAAGAAAACGTCCTGTTCCAGGTCCTGATCGACGAGGAAATCGTGTGCTGTT  
TGCTGGCGACCACTACAGAAATTCATATGGGAGAAGTACCGCAAGCTGTGCGCGACGGCCCGACGGATGTTGACTATTTACGC  
TCGACCCGGGAGCCGTACCCGCTCAAGCTGGAAACCTTCCGCTCATGTGCGGATCGGATTCCACCCGCGTGAAGAAGTGGCGG  
AGCAGGTCGGCGAAGCCTGCGAAGAGTTGCGAGGCGAGCGGCTGGTGAACACGCTGGGTCAATGATGACCTGGTGCATTGC  
AAACGCTAGGGCCTTGTGGGGTCAAGTCCGGCTGGGGGTTGAGCAGCCAGCGCTTACTGGCATTTCAGGAACAAGCGGGCACT  
GCTCGACGCACTTGTCTGCTCAGTATCGCTCGGGACGACGCGCGCTCTACGAACTGCCGATAAACAGAGGATTAATAATTGAC  
AATTGTGATTAAGGCTCAGATTCGACGGCTTGGAGCGGCGGACGTGAGGATTTCCGCGAGATCCGATTGCGGCCCTGAAGAAA  
GCTCCAGAGATGTTCCGGTCCGTTTACGAGCACGAGGAGAAAAGCCCATGGAGGCGTTCGCTGAACGTTGCGAGATGCCGTG  
GCATTCGGCGCTACATCGACGCGAGATCATTGGGCTGTGCGTCTTCAAACAGGAGGACGGCCCAAGGACGCTACAAGGCG  
CATCTGTCCGGCGTTTTCTGTGGAGCCGAAACAGCGAGCCGAGGGTTCGCGGTATGCTGCTGCGGGCGTTGCCGCGGGTTA  
TTGCTCGTATGATCGTCCGACAGATTCACCGGGAATCTGGTGGATGCGCATCTTATCCTCGGCGCACTTAATATTTGCTATTC  
TGGAGCTTGTGTTATTTCCGGTCTACCGCTGCCGGCGGGTTCGCGGCGACGGTAGGCGCTGTGAGCCGCTGATGGTGTGTT  
TCATCTGCGGCTCTGCTAGGTAGCCGATACGATTGATGGCGTCTGGGGGCTATTTGCGGAACTGCGGGCGTGGCGCTGTT  
GGTGTGACACCAACGCGAGCTAGATCTGTGCGGCTGCGAGCGGGCTGGCGGGGGCGTTTCCATGGCGTTCGGAACCGT  
GCTGACCCGCAAGTGGAACCTCCCGTCCCTGCTCACTTTACCGCTGGCAACTGGCGGCGGAGGACTTCTGCTCGTTCCAG  
TAGCTTTAGTGTGTTGATCCGCAATCCCGATGCTACAGGAACCAATGTTCTCGGCTGGCGTGGCTCGGCTGATCGAGCGGG  
TTAACCTACTTCTTTGTTCCGGGGGATCTCGACTCGAACCTACAGTTGTTTCTTACTGGGCTTCTCAGCCGGGATGGCC  
TAAGAAGCTATTGCCCGGATCTTCATATGCGGTGTGAAATACCGCACAGATGCGTAAGGAGAAAATACCGCATCAGCGCTCTT  
CCGCTTCTCGTCACTGACTCGCTGCGTCTGGTTCGGTCTGCGGCGAGCGGTATCAGCTCACTCAAAGCGGTAATACGGTTA  
TCCACAGAATCAGGGGATAACGCGAGAAAGAATGTGAGCAAAAGGCCAGCAAAAGGCCAGGAACCGTAAAAAGGCCGCTT  
GCTGGCGTTTTTCCATAGGCTCCGCCCCCTGACGAGCATCAGAAAATCGACGCTCAAGTCAGAGGTGGCGAAACCCGACAGGA  
CTATAAAGATACCAGCGGTTTCCCGTGAAGCTCCCTGTCGCTCTCTGTTCCGACCCGCTTACCGGATACCTGTCCGCC  
TTTCTCCCTCGGGAAGCGTGGCGTCTTCTCAATGCTCACGCTGTAGGTATCTCAGTTCGGTGTAGGTGTTCCGCTCCAAGCTGGG

CTGTGTGCAGAACCCCCGTTAGCCCGACCGCTGCGCCTTATCCGGTAACTATCGTCTTGAGTCCAACCCGGTAAGACACGACT  
TATCGCCACTGGCAGCAGCCACTGGTAACAGGATTAGCAGAGCGAGGTATGTAGGCGGTGCTACAGAGTTCTTGAAGTGGTGGC  
CTAACTACGGCTACACTAGAAGGACAGTATTTGGTATCTGCGCTCTGCTGAAGCCAGTTACCTTCGAAAAAGAGTTGGTAGCTCT  
TGATCCGGCAAACAAACCACCGCTGGTAGCGGTGTTTTTTGTTTGAAGCAGCAGATTACGCGCAGAAAAAAGGATATCAAG  
AAGATCCTTTGATCTTTCTACGGGGTCTGACGCTCAGTGAACGAAAACTCACGTTAAGGGATTTGGTCATGAGATTATCAAAA  
AGGATCTTACCTAGATCCTTTAAATTAATAAATGAAGTTTTAAATCAATCTAAAGTATATATGAGTAAACTGGTCTGACAGTTAC  
CAATGCTTAATCAGTGAGGCACCTATCTCAGCGATCTGTCTATTTTCGTTCCATCCATAGTTGCCTGACTCCCCGTCGTGTAGATAACT  
ACGATACGGGAGGGCTTACCATCTGCCCCAGTGCTGCAATGATACCGCGAGACCCACGCTCACCGGCTCCAGATTTATCAGCAA  
TAAACCAGCCAGCCGGAAGGCGGAGCGCAGAAGTGGTCTGCAACTTATCCGCTCCATCCAGTCTATTAACAAGTGGCAGC  
AACGGATTGCAAACTGTACGCCTTTTGCCAAAAGCCGCGCAGGTTTGCATCCGCTGTGCCAGGCGTTAGGCGTCATAT  
GAAGATTCGTTGATCCCTGAGCAGGTGGCGGAAACATTGATGCTGAGAACCATTTCATTGTTGTTGAAGTTCGATGTGCAC  
CTATCCGACCAAGGCTTTGAACTATCTACCAAGAGTGTGAGCCCTACCGGAAGGATTACATCTCGGATGATGACTCTGATGAAG  
ACTCTGCTTGTATGGCGCATTATCGACCAAGAGCTTGTGCGGAAGATTGAACTCAACTCAACATGGAACGATCTAGCCTCTATC  
GAACACATTGTTGTGTCGCACACGCACCGAGGCAAAGGAGTGTGCGCACAGTCTCATCGAATTTGCGAAAAAGTGGGCACTAAGC  
AGACAGCTCCTTGGCATAAGATTAGAGACAAAACGAACAATGTACCTGCTGCAATTTGACGCAAAATGTGCTTTACTCTCGG  
CGGCATTGACCTGTTACGTATAAACTAGACCTCAAGTCTCGAACGAAACAGCGATGTACTGGTACTGTTCTCGGGAGCACAG  
GATGACGCCTAACAATTCATTCAAGCCGACACCGCTTCCGCGCGCGCTTAATTCAGGAGTTAAACATCATGAGGGAAGCGGTGA  
TCGCCGAAGTATCGACTCAACTATCAGAGGTAGTTGGCGTATCGAGCGCCATCTCGAACCGACGTTGCTGGCCGTACATTTGTAC  
GGCTCCGAGTGATGGCGGCTGAAGCCACACAGTGTATTTGATTGCTGTTACGGTGACCGTAAGGCTTGATGAAACAACGC  
GGCGAGCTTTGATCAACGACCTTTGAACTTCGGCTTCCCTGGAGAGAGCGAGATTCTCCGCGCTGTAGAAGTACCATTGTT  
GTGCACGACGACATCATTCCGTGCGGTTATCCAGCTAAGCGCAACTGCAATTTGGAGAATGGCAGCGCAATGACATTCTTGAG  
GTATCTTCGAGCCAGCCAGATCGACATTGATCTGGCTATCTTGTGACAAAAGCAAGAGAACATAGCGTTGCTTGGTAGGTCCA  
GCGGCGGAGGAACTCTTGTATCCGTTCTGAAACAGGATCTATTTGAGGCGCTAAATGAAACCTAACGCTATGAACTCGCCGC  
CCGACTGGGCTGGCGATGAGCGAAATGTAGTCTTACGTTGTCGCCGATTTGTTACAGCGCAGTAACCGCAAATCGCGCCGAA  
GGATGTGCTGCCGACTGGGCAATGGAGCGCCTGCCGCCAGTATCAGCCCGTCATACTTGAAGCTAGGCAGGCTTATCTTGA  
CAAGAAGATCGCTTGGCCTCGCGCGCAGATCAGTTGGAAGAATTTGTTACTACGTGAAAGGCGAGATCACCAAGGTAGTCGGC  
AAATAATGTCTAACAATTCGTTCAAGCCGACGCGCTTCCGCGCGCGCTTAATCAAGCGTTAGAGAGCTGGGGAAGACTATGC  
GCGATCTGTTGAAGGTGGTTCTAAGCCTCGTACTTGCATGGCATCGGGGAGGCACTTGCTGACCTGCCAATGTTTTAGTGGAT  
GAAGCTCGTCTTCCATGACTACTCCCATCCAACACGACATTTCTCAAGCAACTACGACAACCTCATAAGCAATTACGACAAT  
AGTCCATCAAATACGACAACCTGAGAGCAACTACGATAATAGTTCATCCAATACGACAATAGTCGCAACGAAATCGTAGGCT  
TATATATAGCGAAATGGGTCTCGCACTTTCCGCGCTACTACGTATTGCCAACAAAGGACAACGAACTCTTTCCACATCTGG  
CAAAAGGATGTTTACACCCCAAAAGGGGGGCGCGGCTATGGCGGCAAAGATGGGAGCTTCTGCGGGGCAATTGGTCTCAT  
AAATGGCAATTTTTCGCTTCCCTGACAGATAACGGCCTGAAGATCATGTATCTAAGCAACTAGCCTGCTCTAATAAAATGTTA  
GGAGCTTGGCTGCCATTTTTGGGGTGAGGCCGTTCCGCGCCGAGGGGCGCAGCCCTGGGGGATGGGAGGCCCGCTTAGCG  
GGCCGGAGGGTTGAGAAAGGGGGGGCACCCCTTCCGCGTGCAGCGTACGCGCCAGGGCGCAGCCCTGGTTAAAAACAAG  
GTTTATAAATATTGTTAAAAAGCAGGTTAAAAGACAGGTTAGCGGTGGCCGAAAAACGGGCGGAAACCTTGCAAATGCTGGA  
TTTTCTGCTGTGGACAGCCCTCAAATGTCAATAGGTGCGCCCTCATCTGTACGACTCTGCCCTCAAGTGTCAAGGATCGCGC  
CCCTCATCTGTAGTAGTCGCGCCCTCAAGTGTCAATACCGCAGGGCACTTATCCCGAGCTTGTCCACATCATCTGTGGAAACT  
CGCGTAAAATCAGGCGTTTTCCGATTTGCGAGGCTGCCAGCTCCACGTCGCGGCGGAAATCGAGCCTGCCCTCATCTGTCA  
ACGCGCGCCGGTGAGTCGGCCCTCAAGTGTCAACGTCGCCCTCATCTGTAGTGTAGGGCAAGTTTTCCGCGAGGTATCC  
ACAACGCCGGCGCCGCGGCTGCTCGCACAGGCTTCCGCGGCTTCTGGCGGTTTGCAGGGCCATAGACGGCCGCCA  
GCCAGCGGCGAGGGCAACCAGCCGTTGAGCGTCGAAAGGGTGCACATCTGCTGCGTTCGGATTTTTGTTGAGTTCCCG  
CCACAGACCCGATTGAAGGCGAGATCCAGCAACTCGCGCCAGATCATCTGTACGGAACTTTGGCGGTGATGACTGGCCAG  
GACGTGCGCCGAAAGAGCGACAAGCAGATCACGATTTTCGACAGCGTCGATTTGCGATCGAGATTTTTGCGCGCTGCGCTAGG  
TCCGCGACCGCTTGAAGGATCAAGCCACAGCAGCCACTCGACCTTAGCCGACCCAGACGAGCCAAGGGATTTTTTGAAT  
GCTGCTCCGTCGTAGGCTTTCCGACGTTTGGGTGTTGAACAGAAGTCATTATCGTACGAAAGTCCAGCACTCCCGAGGGGAAC  
CCTGTGGTTGCGATGCACATACAAATGGACGAACGGATAAACCTTTTACGCCCTTTAAATATCCGTTATTCTAATAAACGCTCTT  
TTCTCTAGGTTTACCCGCAATATATCTGTCAAACACTGATAGTTTAACTGAAGGCGGAAACGACAATCTGATCATGAGCGG  
AGAATTAAGGGAGTACGTTATGACCCCGCCGATGACGCGGGAACAGCCGTTTTACGTTTGAAGTACAGAACCGCAACGATT  
GAAGGAGCCACTCAGCCCAATACGCAAACCGCTCTCCCGCGGTTGGCCGATTCAATATGAGCTGGCAGCAGAGTTTCCC  
GACTGGAAAGCGGGCAGTGAGCGCAACGCAATTAATGTGAGTTAGTCACTCATTAGGCACCCAGGCTTACACTTTATGCTTCC

GGCTCGTATGTTGTGTGGAATTGTGAGCGGATAACAATTCACACAGGAAACAGCTATGACCATGATTACGCCAAGCTATTTAGG  
TGACTATAGAATACTCAAGCTATGCATCCAACGCGTTGGAGCTCTCCATATCGACCTGCAGGCGGCCGCTCGACGAATTAAT  
TCCAATCCCACAAAAATCTGAGCTTAACAGCACAGTTGCTCCTCTCAGAGCAGAATCGGGTATTCAACCCCTCATATCAACTACTA  
CGTTGTGTATAACGGTCCACATGCCGTATATACGATGACTGGGGTTGTACAAAGGCGGCAACAAACGGCGTTCCCGGAGTTGCA  
CACAAGAAATTTGCCACTATTACAGAGGCAAGAGCAGCAGCTGACGCGTACACAACAAGTCAGCAAACAGACAGGTTGAACTTCA  
TCCCAAAGGAGAAGCTCAACTCAAGCCCAAGAGCTTTGCTAAGGCCCTAACAAAGCCCAAAAGCAAAGCCCACTGGCTCAC  
GCTAGGAACCAAAGGCCAGCAGTGATCCAGCCCCAAAAGAGATCTCCTTTGCCCGGAGATTACAATGGACGATTTCTCTATC  
TTTACGATCTAGGAAGGAAGTTCGAAGGTGAAGGTGACGACTATGTTACCACCTGATAATGAGAAGGTTAGCCTCTCAATTT  
AGAAAGATGCTGACCCACAGATGGTTAGAGAGGCTACGCAGCAGGTCTCATCAAGACGATCTACCCGAGTAAACAATCTCCAG  
GAGATCAAATACCTTCCAAGAAGGTTAAAGATGCAGTCAAAAGATTGACTAATTGCATCAAGAACACAGAGAAAGACATAT  
TTCTCAAGATCAGAAGTACTATTCCAGTATGGACGATTCAAGGCTTGCTTATAAACAAGGCAAGTAATAGAGATTGGAGTCTCT  
AAAAAGGTAGTTCTACTGAATTAAGGCCATGCATGGAGTCTAAGATTCAAATCGAGGATCTAACAGAACTCGCCGTGAAGACT  
GGCGAACAGTTCATACAGAGTCTTTACGACTCAATGACAAGAAGAAAATCTTCGTCAAATGGTGGAGCACGACTCTGGTCT  
ACTCAAAAATGTCAAAGATACAGTCTCAGAAGACCAAAGGGCTATTGAGACTTTTCAACAAAGGATAATTTCCGGAAACCTCTCT  
GGATTCATTGCCAGCTATCTGTCACTTCAATCGAAAGGACAGTAGAAAAGGAAGTGGCTCTACAATGCCATCATTGCGATA  
AAGGAAAGGCTATCATTCAAGATCTCTGCGGACAGTGGTCCCAAAGATGGACCCCAACCCAGAGGAGCATCGTGAAAAAG  
AAGAGTTCACACCAGTCTTCAAAGCAAGTGGATTGATGTGACATCTCCACTGACGTAAAGGATGACGCACAATCCCACTATCT  
TCGCAAGACCTTCTCTATATAAGGAAGTTCAATTTGAGAGGACAGCTCGAGGAATTCGGTACCC

## U6-26:Ps#1 gRNA plasmid

U6-26 promoter, Ps#1 gRNA

>

ACCTAGGGAGCTCTCCATATCGACCTGCAGGCGGCCGACTAGTGATATCCCGCGCCATGGCGGCCGGAGCATGCGACGTC  
GGGCCCAATTCGCCCTATAGTGAGTCGTATTACAATTCAGTGGCGTCTTTTACAACGTCGTGACTGGGAAAACCTGGCGTTAC  
CCAATTAATCGCCTTGACGACATCCCCCTTTCGCCAGCTGGCGTAATAGCGAAGAGGCCCGCACCGATCGCCCTTCCAACAGT  
TGCGCAGCCTGAATGGCGAATGGAATGTAAACGTTAATGGGTTTCTGGAGTTAATGAGCTAAGCACATACGTGAGAAACCAT  
TATTGCGGTTCAAAGTGCCTAAGGTCACTATCAGCTAGCAAATATTTCTGTCAAAAATGCTCCACTGACGTTCCATAAATTC  
CCTCGGTATCCAATTAGAGTCTCATATTCCTCAATCAAATAATCTGCAATGGCAATTACCTTATCCGCACTCTTTACCTATTT  
CCGCCGGATCCGGGAGGTTCTCCGGCGCTGGGTGGAGAGGCTATTGGCTATGACTGGGCACAACAGACAATCGGCTGCT  
CTGATGCCGCGTGTCCGGCTGTCAGCGCAGGGCGCCGCTTCTTTGTCAAGACCGACCTGTCCGGTGCCTGAATGAACT  
GCAGGACGAGGACGCGCGCTATCGTGGCTGGCCACGACGGCGTTCCTTGCAGCTGTGCTCGACGTTGCTACTGAAGCGGG  
AAGGGACTGGCTGCTATTGGGCGAAGTGGCGGGCAGGATCTCCTGTATCTCACCTTGTCTCTGCCGAGAAAGTATCCATCATG  
GCTGATGCAATGCGGCGGCTGCATACGCTTATCCGGCTACCTGCCATTGACCCCAAGCGAAACATCGCATCGAGCGAGCAC  
GTACTCGGATGGAAGCCGCTTGTGATCAGGATGATCTGGACGAAGAGCATCAGGGGCTCGGCCAGCCGAAGTTCGCCA  
GGCTCAAGGCGCATGCCGACGCGAGGATCTCGTGTGACCCATGGCGATGCTGCTTCCGAATATCATGGTGGAAAATG  
GCCGTTTTCTGGATTCTGACTGTGCCGGCTGGGTGGCGGACCGCTATCAGGACATAGCGTTGGCTACCCGTGATATTGC  
TGAAGAGCTTGGCGGCAATGGGCTGACCGTCTCCTGTGCTTACGGTATCGCCGCTCCGATTGCGAGCGCATCGCCTTCTATC  
GCCTTCTGACGAGTCTTCTGAGCGGGACTCTGGGGTTCGAAATGACCGACCAAGCGACGCCAACCTGCCATCACGAGATTT  
GATTCACCCCGCCTTCTATGAAAGGTTGGGCTTCGGAATCGTTTTCCGGGACCGGCTGGATGATCTCCAGCGCGGGGATC  
TCATGCTGGAGTCTTCCGCCACCCGATCCAACACTTACGTTTGAACGTCGAAGAGCAAATAGACCACGAACCGGAAAGGTTG  
CCGAGCGTGTGGATTGCGTCTCAATCTCTTTCAGGAATGCAATGATGAATATGACTGACTATGAAACTTTGAGGGAATCA  
TGCTAGCACCGTCACTCATAACGTGCATCATGCATGCCCTGACAACATGGAACATCGCTATTTTTCTGAAGAATTATGCTGTTG  
GAGGATGTCGCGCAATTGACGCTATTGCCAATCGAACTACCCCTCACGATGATTATCAATATTATTCATGCGGGAAAGG  
CAAGATTAATCAACTGGCAAATCATCCAGCGTGAATGGTAACCTCAGTTCAGCGACTTGATTGTTTTGGTGTACCCAGTTTT  
CAATAAGGACGAGATGGTGGAGTAAAGAAGGAGTGCCTGCAAGCAGATCGTTCAAACATTTGCAATAAAGTTTCTTAAGATTG  
AATCCTGTTGCCGCTTTCGATGATTATCATATAATTTCTGTTGAATTACGTTAAGCATGTAATAATTAACATGTAATGCATGACG  
TTATTTATGAGATGGGTTTTATGATTAGAGTCCCGCAATTATACATTTAATACGCGATAGAAAACAAAATATAGCGCGCAAATA  
GGATAAATATCGCGCGGCTGATCTATGTTACTAGATCGAATTAATTCAGTACATTAACAAACGTCGCCAATGTGTTATTAAGT  
GTCTAAGCGTCAATTTGTTTACCCACAATATATCTGCCACCAGCCAGCCAACAGCTCCCGACCGGAGCTCGGCACAAAATCA



CCACTCGATACAGGCAGCCCATCAGTCCGGACGGCGTCAGCGGGAGAGCCGTTGTAAGGCGGCAGACTTTGCTCATGTTACCG  
ATGCTATTCGGAAGAACGGCAACTAAGCTGCCGGTTTAAACACGGATGATCTCGCGAGGGTAGCATGTTGATTGAACGAT  
GACAGAGCGTTGCTGCTGTGATCAAATATCATCTCCCTCGCAGAGATCCGAATTATCAGCCTTCTTATTCATTTCTCGCTAACCG  
TGACAGGCTGTGATCTTGAGAATATGCCGACATAATAGGAAATCGCTGGATAAAGCCGCTGAGGAAGCTGAGTGGCGTATTT  
CTTTAGAAGTGAACGTTGACGATGTCGACGGATCTTTTCCGCTGCATAAACCTGCTTCGGGGTCAATTATAGCGATTTTTTCGGTATA  
TCCATCTTTTTTCGACGATATACAGGATTTTCCAAAGGGTTCGTGTAGACTTTCTTGGTGTATCCAACGGCGTCAGCCGGCA  
GGATAGGTGAAGTAGGCCACCCGCGAGCGGGTTCCTTCTTACTGTCCCTTATTGACCTGGCGGTGCTCAACGGGAATCT  
GCTCTGCGAGGCTGGCCGCTACCGCCGGCGTAACAGATGAGGGCAAGCGGATGGCTGATGAAACCAAGCCAACAGGGGTGA  
TGCTGCCAACTTACTGATTTAGTGTATGATGGTGTTCCTGAGGTGCTCCAGTGGCTTCTGTTTCTATCAGCTGCCCTCTGTTACG  
TACTGACGGGGTGGTGCCTAACGGCAAAGCACCGCCGACATCAGCGTATCTGCTCTACTGCCGTAACCATGGCAACTG  
CAGTTCACTTACACCGCTTCTCAACCCGTACGCACCCAGAAAATCATTGATATGGCCATGAATGGCGTTGGATGCCGGCAACAG  
CCCGATTATGGGCGTTGGCCTCAACACGATTTTACGTCACTTAAAAAATCAGGCCGAGTCGGTAACCTCGCGCATACAGCCGG  
GCAGTGACGTCATCGTCTGCGCGAAATGGACGAACAGTGGGGCTATGTCCGGGCTAAATCGCGCCAGCGCTGGCTGTTTTACG  
CGTATGACAGTCTCCGGAAGACGGTTGTTGCGCACGTATCGGTGAACGCACTATGGCGACGCTGGGGCGTCTTATGAGCCTGCT  
GTCACCTTTGACGTGGTGATATGGATGACGGATGGCTGGCCGCTGTATGAATCCCGCCTGAAGGGAAAGCTGCACGTAATCAGC  
AAGCGATATACGACGCAATTGAGCGGCATAACCTGAATCTGAGGCAGCACCTGGCACGCTGGGACGGAAGTCGCTGTCGTTT  
TCAAATCGGTGGAGCTGCATGACAAAGTCACTCGGGCATTATCTGAACATAAAACACTATCAATAAGTTGGAGTCATTACCCAACC  
AGGAAGGGCAGCCACCTATCAAGGTGACTGCCTCCAGACGAACGAAGAGCGATTGAGGAAAAGGCGCGCGGCCGCGCAT  
GAGCCTGTCGGCTACCTGCTGCGCGTCCAGGGCTACAAAATCACGGCGTCTGTTGACTATGAGCACGTCGCGAGCTGGC  
CCGCATCAATGGCGACCTGGGCCGCTGGCGGCTGCTGAACTCTGGCTCACCGACGCCGCGCACGGCGGTTCCGTTGA  
TGCCACGATCTCGCCTGCTGGCGAAGATCGAAGAGAAGCAGGACGAGCTTGCAAGGTATGATGGCGTGGTCCGCCGAG  
GGCAGAGCCATGACTTTTTAGCCGCTAAAACGGCCGGGGGTGCGCGTGATTGCCAAGCACGTCCTCCATGCGCTCCATCAAGAA  
GAGCGACTTCCGCGAGCTGGTATTGCTGACGGGCAAGATTCCGAATACCAAGTACGAGAAGGACGGCCAGACGGTCTACGGGA  
CCGACTTCAATGCCGATAAGGTGGATTATCTGGACACCAAGGACCAGCGGGTCAAATCAGGAATAAGGGCACATTGCCCGG  
CGTGAGTCCGGGCAATCCCGCAAGGAGGGTGAATGAATCGGACGTTTGACCGGAAGGCATACAGGCAAGAAGTATGACGCG  
GGTTTTCCGCGAGGATGCCGAAACCATCGCAAGCCGACCGTCAATGCGTGCGCCCGCGAAACCTTCCAGTCCGTCGCTCGA  
TGGTCCAGCAAGTACCGCCAAGATCGAGCGGACAGCGTGCAACTGGCTCCCTGCTCCCGCGCCATCGGCCCGTGGGA  
GCGTTCGCGTCTCGAACAGGAGGCGGCAGGTTTGGCGAAGTCGATGACCATCGACACGCGAGGAACTATGACGACCAAGAA  
GCGAAAAACCGCCGCGAGGACCTGGCAAACAGGTCAGCGAGGCCAAGCAGGCCGCTGCTGAAAACACAGAAAGCAGCAGA  
TCAAGGAAATGAGCTTTCTTGTTCGATATTGCGCGTGGCCGACACGATGCGAGCGATGCCAAACGACACGGCCCGCTGTC  
CCTGTTACACCGCGCAACAAGAAAATCCCGCGAGGCGCTGAAAACAAGGTCAATTTCCACGTCACAAGGACGTGAAGATC  
ACCTACACCGCGTCGAGCTGCGGGCCGACGATGACGAACTGGTGTGGCAGCAGGTGTTGGAGTACGCGAAGCGCACCCCTATC  
GGCGAGCCGATCACCTTACGTTCTACGAGCTTGGCAGGACCTGGGCTGGTGCATCAATGGCCGGTATTACAGGAAGGCCGAGG  
AATGCTGTGCGCCTACAGGCGACGGCGATGGGCTTACGTCACCGACCGTGGGCACTGGAATCGGTGTCGCTGCTGCACCG  
CTTCCGCTCTGGACCGTGGCAAGAAAACGTCCTGTTGCCAGTCTGATCGACGAGGAAATCGTGTGCTGTTTGGTGGCGAC  
CACTACAGGAAATTCATATGGGAGAAGTACCGCAAGTGTGCGCGACGGCCCGACGGATGTTGACTATTTAGCTCGCACCCGGG  
AGCCGTACCCGCTCAAGCTGGAAACCTTCCGCCTCATGTGCGGATCGGATCCACCCGCGTGAAGAAGTGGCGCGAGCAGGTCG  
GCGAAGCCTGCGAAGAGTTGCGAGGACGCGCCTGGTGAACACGCTGGGTCAATGATGACCTGGTGCATTGCAAACGCTAG  
GGCCTTGTGGGGTCAAGTCCGGCTGGGGTTCAGCAGCCAGCGTTTACTGGCATTTCAGGAACAAGCGGGCACTGCTCGACGC  
ACTTGTCTGCTCAGTATCGTCTGGGACGCACGGCGCTCTACGAACTGCCGATAAACAGAGGATTAATAATTGACAATTGTGATT  
AAGGCTCAGATTGACGCGTTGGAGCGGCCGACGTGACGAGATTCCGCGAGATCCGATTGTCGGCCCTGAAGAAAGTCCAGAG  
ATGTTCCGGTCCGTTTACGAGCACGAGGAGAAAAAGCCATGGAGGCTTCGCTGAACGTTGCGAGATGCCGTGGCATTGCGC  
GCCTACATCGACGGCGAGATCATTGGGCTGTGCTTCAAACAGGAGGACGCCCCAAGGACGCTCACAAGGCGCATCTGTCC  
GGCGTTTTGTTGAGCCGAAACAGCGAGGCCGAGGGTTCGCGGTATGCTGCTGCGGGCGTTGCCGGCGGGTTTATTGCTCGTG  
ATGATCGTCCGACAGATTCACCGGAATCTGGTGGATGCGCATCTTATCCTCGGCGCACTTAATATTTGCTATTCTGGAGCTT  
GTTGTTTATTTGCTTACCGCTGCCGGCGGGGTGCGCGGACGCTAGGCGCTGTGCAGCCGCTGATGGTGTGTTTCTCTCT  
GCCGCTCTGCTAGGTAGCCGATACGATTGATGGCGTCTGGGGCTATTTGCGAACTGCGGGCGTGGCGCTGTTGGTGTG  
ACACCAAACGACGCTAGATCTGTCGGCTGCGAGCGGGCCTGGCGGGGCGTTTCCATGGCGTTCGGAACCGTGTGACC  
CGCAAGTGGCAACCTCCCGTGCCTGCTCACCTTTACCGCTGGCAACTGGCGGCCGGAGGACTTCTGCTCGTTCCAGTAGCTTT  
AGTGTTTGATCCGCAATCCCGATGCTACAGGAACCAATGTTCTCGGCTGGCGTGGCTGGCCTGATCGGAGCGGGTTAAC  
TACTTCTTTGGTTCCGGGGATCTCGGACTCGAACCTACAGTTGTTTCTTACTGGGCTTCTCAGCCGGGATGGCGTAAGAA

GCTATTGCCGCGATCTTCATATGCGGTGTGAAATACCGCACAGATGCGTAAGGAGAAAATACCGCATCAGGCGCTCTCCGCTTC  
CTCGTCACTGACTCGTCTCGTCTCGTCTCGGCTCGGCGAGCGGTATCAGTCACTCAAAGGCGGTAATACGTTATCCACA  
GAATCAGGGGATAACGCAGGAAAGAACATGTGAGCAAAAGGCCAGCAAAGGCCAGGAACCGTAAAAAGCCGCGTTGCTGGC  
GTTTTCCATAGGCTCCGCCCTGACGAGCATCAAAAAATCGACGCTCAAGTCAGAGGTGGCGAAACCCGACAGGACTATAA  
AGATAACCAGGCGTTCCCTGGAAGCTCCCTCGTGCCTCTCCTGTTCCGACCTGCCGCTTACCGGATACCTGTCCGCTTTCTC  
CCTTCGGGAAGCGTGGCGCTTTCTCAATGCTCACGCTGTAGGTATCTCAGTTCGGTGTAGGTCGTTCCGCTCAAGCTGGGCTGTG  
GCACGAACCCCGTTCAGCCGACCGCTGCGCCTTATCCGGTAACTATCGTCTTGAGTCCAACCCGTAAGACACGACTTATCGC  
CACTGGCAGCAGCACTGGTAACAGGATTAGCAGAGCGAGGTATGTAGGCGGTGCTACAGAGTCTTGAAGTGTGGCCTAACT  
ACGGCTACACTAGAAGGACAGTATTTGGTATCTGCGCTCTGCTGAAGCCAGTTACCTTCGAAAAAGAGTTGGTAGCTTTGATCC  
GGCAAACAAACCACCGCTGGTAGCGGTGGTTTTTTGTTTCAAGCAGCAGATTACGCGCAGAAAAAAGGATATCAAGAAGATC  
CTTTGATCTTTTCTACGGGCTGACGCTCAGTGAACGAAAACCTCAGTAAAGGATTTTGGTCATGAGATTATCAAAAAGGATC  
TTCACCTAGATCCTTTAAATTAATAAAGTAAATCAATCTAAAGTATATGAGTAACTTGGTCTGACAGTTACCAATGC  
TTAATCAGTGAGGCACCTATCTCAGCGATCTGTCTATTTCTCATCCATAGTTGCCTGACTCCCGCTCGTGTAGATAACTACGATA  
CGGGAGGGCTTACCATCTGGCCAGTGTGCAATGATACCGCGAGACCCACGCTCACCAGTCCAGATTTATCAGCAATAAACC  
AGCCAGCCGGAAGGGCCGAGCGCAGAAGTGGTCTGCAACTTATCCGCTCCATCCAGTCTATTAACAAGTGGCAGCAACGGA  
TTCGCAAACCTGTACGCCTTTGTGCCAAAAGCCGCGCCAGGTTGCGATCCGCTGTGCCAGGCGTTAGGCGTCATATGAAGATT  
TCGGTGATCCCTGAGCAGGTGGCGGAAACATTGGATGCTGAGAACCATTTTATTGTTTCGTGAAGTGTTCGATGTGCACCTATCCG  
ACCAAGGCTTTGAAGTATCTACCAGAAGTGTGAGCCCTACCGGAAGGATTACATCTCGGATGATGACTCTGATGAAGACTCTGCT  
TGCTATGGCGCATTATCAGCAAGAGCTTGTGCGGAAAGATTGAACTCACTCAACATGGAACGATCTAGCCTCTATCGAACACAT  
TGTGTGTCGCACACGCACCGAGGCAAAGGAGTGCAGCAGTCTCATGAATTTGCGAAAAAGTGGGCACTAAGCAGACAGCT  
CCTTGGCATAAGATTAGACACAAACGAACAATGTACTGCTGCAATTTGTACGAAAAAGTGGCTTTACTCTCGGCGGCATTG  
ACCTGTTACGTATAAACTAGACCTCAAGTCTGAACGAAACAGCGATGTACTGTTACTGTTCTCGGGAGCACAGGATGACGC  
CTAACAATTCATTCAAGCCGACACCGCTTCGCGCGCGGCTTAATTCAGGAGTTAAACATCATGAGGGAAGCGGTGATCGCCGAA  
GTATCGACTCAACTATCAGAGGTAGTTGGCGTATCGAGCGCATCTCGAACCGACGTTGCTGGCCGTACATTTGTACGGCTCCGC  
AGTGGATGGCGCCTGAAGCCACACAGTGATATTGATTGCTGGTTACGGTACCGTAAGGCTTATGAACAACCGCGCGAGC  
TTTGATCAACGACCTTTTGAACCTTCGCTCCCTGAGAGAGCGAGATTCTCCGCGCTGTAGAAGTACCATTGTTGTGCACG  
ACGACATCATTCCGTGGCGTTATCCAGCTAAGCGGAACTGCAATTTGAGAATGGCAGCGCAATGACATTCTTGAGGTATCTTC  
GAGCCAGCCAGATCGACATTGATCTGGCTATCTTGTGACAAAAGCAAGAGAACATAGCGTTGCCTTGGTAGGTCCAGCGGGG  
AGGAACTCTTTGATCCGTTCTGAACAGGATCTATTTGAGGCGTAAATGAACTTAAAGCTATGGAACCTCGCCGCGGACTGG  
GCTGGCGATGAGCGAAATGTAGTGCTTACGTTGCTCCGCAATTTGGTACAGCGCAGTAACCGGCAAATCGCGCCGAAAGGATGC  
GCTGCCGACTGGGCAATGGAGCGCCTGCCGCCCAGTATCAGCCGTCATACTTGAAGCTAGGCGAGGCTTATCTTGGACAAGAAG  
ATCGCTTGGCTCGCGCAGATCAGTTGGAAGAATTTGTTCACTACGTGAAAGGCGAGATCACCAAGGTAGTCGGCAAATAATG  
TCTAACAATTCGTTCAAGCCGACGCCGCTTCGCGCGCGGCTTAACTCAAGCGTTAGAGAGCTGGGGAAGACTATGCGCGATCTG  
TTGAAGGTGGTTCAAGCCTCGTACTTGCATGCGATGGCATCGGGG CAGGCACTTGTGACTGCCAATTGTTTTAGTGGATGAAGCTC  
GTCTCCCTATGACTACTCCCATCCAACACGACATTTCTCCAAGCAACTACGACAACCTCCATAAGCAATTACGACAATAGTCCAT  
CAAATTACGACAACCTGAGAGCAACTACGATAATAGTTCATCCAATTACGACAATAGTCGCAACGAAATCGTAGGCTTATATAT  
AGCGCAAATGGGTCTCGCACTTTCCGCGCTACTACGTATTGCCAACAATGGGACAACGAACTTCTTTCCACATCTGGCAAAG  
GATGTTCTACACCCAAAAGGGGGCGCGGCTATGCGCGCAAAGATGGGAGCTTCTGCGGGCATTGGTCGCATAAATGG  
CCAATTTGCTTCCCTGACAGATAACGGCCTGAAGATCATGTATCAAGCAACTAGCCTGCTCTAATAAAATGTTAGGAGCTT  
GGCTGCCATTTTGGGGTAGGCGGTTGCGGCGGAGGGGCGCAGCCCTGGGGGATGGGAGGCCCGGTTAGCGGGCCGGG  
AGGGTTCGAGAAGGGGGGACCCCTTCGCGGTGCGCGTACGCGCCAGGGCGCAGCCCTGGTAAAAACAAGGTTTATAA  
ATATTGGTTAAAAGCAGGTTAAAAGACAGGTTAGCGGTGGCCGAAAAACGGGCGGAAACCTTGCAAATGCTGGATTTTCTGCC  
TGTGGACAGCCCTCAAATGTCAATAGGTGCGCCCTCATCTGTCAGCACTGCCCCCTCAAGTGTCAAGGATCGCGCCCTCATC  
TGTAGTAGTCCGCCCCCAAGTGTCAATACCGCAGGGCACTTATCCCCAGGCTTGTCCACATCATCTGTGGGAAACTCGCGTAA  
AATCAGGCGTTTTGCGCGATTTGCGAGGCTGGCCAGCTCCAGTCCGCGGCCGAAATCGAGCCTGCCCTCATCTGTCAACGCCGC  
GCCGGGTGAGTCGGCCCCCAAGTGTCAACGTCGCCCTCATCTGTGAGTGGGCAAGTTTTCCGCGAGGTATCCACAACGC  
CGGCGCCGCGCGGTGTCTGCACACGGCTTCGACGCGTTTTCTGCGCGTTTTGCGAGGCCATAGACGGCCGACAGCCAGC  
GGCGAGGGCAACCGGAGCGTGCAGCGTAAAGGGTGCACATCTGCTGCGTTCGATATTTCTGGAGTTCGCCACAGA  
CCCGATTGAAGGCGAGATCCAGCAACTCGCGCCAGATCATCTGTGACGGAACCTTGGCGCGTATGACTGGCCAGGACGTGC  
GCCGAAAGAGCGACAAGCAGATCACGATTTTCGACAGCGTCGATTTGCGATCGAGGATTTTTCGGCGCTGCGTACGTCCGCGA  
CCGCGTTGAGGGATCAAGCCACAGCAGCCACTCGACCTTAGCCGACCCAGACGAGCCAAGGGATCTTTTGAATGCTGCTC

CGTCGTCAGGCTTTCCGACGTTTGGGTGGTTGAACAGAAGTCATTATCGTACGGAATGCCAGCACTCCCGAGGGGAACCTGTGG  
TTGGCATGCACATACAAATGGACGAACGGATAAACCTTTTACGCCCTTTAAATATCCGTTATTCTAATAAACGCTCTTTCTCTTA  
GGTTTACCCGCAATATATCTGTCAAACACTGATAGTTAACTGAAGCGGGAAACGACAATCTGATCATGAGCGGAGAATTA  
AGGGAGTCAGGTTATGACCCCGCCGATGACGCGGGACAAGCCGTTTACGTTTGGAACTGACAGAACCACAACGATTGAAGGA  
GCCACTCAGCCCAATACGCAAACCGCTCTCCCGCGCGTTGGCCGATTCTTAATGACAGCTGGCAGCAGGTTTCCCGACTGG  
AAAGCGGGCAGTGAGCGCAACGCAATTAATGTGAGTTAGCTCACTCATTAGGCACCCAGGCTTTACTTTATGCTTCCGGCTCG  
TATGTTGTGTGGAATTGTGAGCGGATAACAATTTACACAGGAAACAGCTATGACCATGATTACGCCAAGCTATTTAGGTGACT  
ATAGAATACTCAAGCTATGCATCCAACGCGTTGGAGCTCCCTAGG CTTTTTTCTTCTTCTGTTTCATACAGTTTTTTTTGTTTAT  
CAGCTTACATTTTCTGAACCGTAGCTTTCTGTTTTCTTCTTTTAACTTTCCATTCCGAGTTTTTGTATCTGTTTCATAGTTTGTCCA  
GGATTAGAATGATTAGGCATCGAACCTTCAAGAATTTGATTGAATAAAACATCTTATTCTTAAGATATGAAGATAATCTTCAAAA  
GGCCCTGGGAATCTGAAAGAAGAGAAGCAGGCCATTTATATGGAAAGAACAATAGTATTTCTTATATAGGCCATTTAAGTT  
GAAAAAATCTTCAAAAGTCCACATCGCTTAGATAAGAAAACGAAGCTGAGTTTATATACAGCTAGAGTCGAAGTAGTGATT GA  
ATGTCTGTTGCCTGTAGTTTATAGAGCTAGAAATAGCAAGTTAAAAAAGGCTAGTCCGTTATCAACTGAAAAAGTGGCACCGA  
GTCGGTGCTTTTTTCTAGACCCAGCTTTCTGTACAAAGTTGGCATT

Plasmids for Allele-specific DSB induction and allele dependent repair:

We used similar plasmids as for Tomato fruit color assay with different gRNA molecule:

GAGCGTATATAATGCTGCTTGTGTTTAGAGCTAGAAATAGCAAGTAAAAATAAGGCTAGTCCGTTATCAACTGAAAAAGTGGCACCG  
GAGTCGGTGCTTTTTT

**Plasmids for synthetic crossover control (inverse PCR assay):**

>R1

GGAGCAACCTTATTTTGTACTTTAAAAAATTCATTTTTTTATTTTTTCGACTTTAAAGCCAAAATTATCCTTTATTTATGAAAGTGGAA  
TGATTTTTATCCCTTAATATAAGGTTGAGTTTTCTTTAAGTTTGAATGTTAAGTGGGGCACTTTATATTAGTCCAATTAACAGAA  
TTGACTTAGAAATTGATGGCGATTACTTGAATAAATCGCTACAAAAACATAATAAAATAAAATTTCAATTTGATTTTTAAACCAAAG  
AAAAGTGACATGACTAACGATTTGATCCCATCTTCTTTTTTTTAAAGAAAAAATTAAGAAAAATTTATTAACCTGGATGATTA  
ATTTAACATAAAAAATTAATAAATAAATAAATCAATCGAGCTCACTATTTGATATTATTATTTTATCTTGGATTTGTTACTTCATATCA  
CTGAATTATAAAATGCGTTAACGGCAATTATCATAGACGCAGACTGAAAGCATAAAAATTCAAACTATTCCATTTTTGTTTTTTTTG  
CCAAACCAAAAAAATAAATTTATTTACATAATTATAGAAAATTTGGAATTTATTCATGTTTTGACCATTAGATAACCCAC  
AATAAAAAAAGTGCACAAAAGTGCAAAGTGCTACGTGCTCAATTATAGCCACTACTACATTTGTCATAAAATTAGCCACCATT  
ATTTTTAAGATTATCTTTTTCTGTTTTAATTTATATGCCACACTTTCTATTAATCCATCTTAACAGAAATGACACACTTTTTATTTG  
ACAAATATTTAATGACATTATAACATTTTATCCTCGTTAGATTTCACTTATTTGTTAAAGTGGTGTACTTTCTAATCTAAAATC  
ATTAATTTAGGTATAATTTAGAACATTGCAAAGCCTTTTATATATTTAAACAATGTAATAAATTATGTAATTATGTTATGTTATAT  
AAATTGAGACGAAAAAATATTATTTATCAGGTACGAGTGTCACTTTACTAGAGGTTTACGACAGAGACGAATCCAAGAT  
TTGAACTTCATGGTGTCAAGTATACACATTGCTTAGATTATAAATCAACTTTAGGTTTCAATCCGCACAAAATCTATAAAACATA  
ACCTTTTTAAAAATAATTTACTAATATTATAAACATATATTATTCTTTATAATAGTTCTCGACGAGTTACATATTTTCAAACTGT  
CAATTAGAACATCATTACTTATATTTGTAATGTATCACTTACTACGTAACAACTAAACAAATCATTGAAATCACTCATCACTCT  
TATTTATATTTATTTTTTATCTACTTACCAAAGAAAATGATAATTTACAATTGCGATTGCTACCAGAAAAATTTACTTAATCA  
ATTTAAAAAAGATTAAGTAATAGAAATTTTTTTATTTTATTAAGAAAAGAGGATTTTATCATATCTAAATAAATAAAGATGAA  
GTTACTATGATATTATTTAAAAAGTAAATGACATTATTCTATTTAAATTACAAAATGAGATTAAGAAAAGTAACTATTTCCATTTT  
TTAGCTAAAAGGATTTCAAAAAAAGTAAACAAGAAAGAGATTTTTAAAAAATAAATTTTATTAGAAATATATAAAAAAT  
TAATAATATTGTTAGAAAAGTGAATTTTCAAAAATAAAGTAATAACACGAATACTTTTAGGGTCAACAATAATAGTGGAG  
AATGGAGATATTTTATGACAAATTTTATACAAAATATCTTTATCAATGTGACATAATTTAAGCTATTTTTAACACTTTTCCATC  
AAATAAATAATTAATAACAAATTTTAAAAAATCAAAGATTAATAAATTAATTAATGAATATAATTAGTTATTAACCAAGCCA  
ACTAGAATTAATAGAAAAAAGGAAATATAATCTTCAAAAATATGCTTTGTTGAAAGTATAATTCTCTGCTATTTAAAGCTTCGGAG  
ATTTAAATTGGCAAGCGAATTACACAAAGCAAATGAAACTACACCTTTTGGTTCTGTGGGTGTCATTTGCTTATTTATAACATTGT  
ACATATATACACCTATATGTATATCACGTTTCGATCGAAGCTCGTGGGTGGCGTGGACCCATAAATCGTAGTAGATTCGCCCTG

TTTACGGATCGATTTAGGTCGGTTATAGATCAAAATCAAATCAATTTAATTAATTTTACCAATCAAACCAAATCAAATATACTATAC  
ATTTATTGGTTGGTTGTTGCGAATTTGATTGATTGATTCAATTATTCGATTATCAATCATACAGAAATAAAAGAAACAATTCATT  
TTAAAGAGGAACAAAAGAGGCAAGAACTCATTCAAATGAAAAACTTAAAAATAGCCGAATTTATAAACTTTTTTACTAAAT  
TACTGTGAATAAACTTTTAAATTCACCATTTTAGCCTAGAAGTAAGAGAGAAAAACATTTCCACCAAGAATTGTCAAGAATACT  
ATATACATGAAACCAATATGATAAATGTTCTCTCAGGACGGTTCATAAATAAATATGATAAACATATATAAGATATTTAAATAA  
AATAAAATATATATATAAAATTTATCGGTTGATTATTTCTCACTTTTTAAATAAAATCAAAGACTATCAATTCCTAAGAACT  
TAGAACAACTAAACCAAATAAAATTAACGATTTAATCACTTAATTTAATTTTTCAATGTGGGTCAATTTTTATCCAAATACTTT  
ACCCCACTTTTACCATCACAAAGGGTAAGAACTAGCAAATTTTTGCCTTAACAAAACTTACTATTGGTGTAGAGAAAATTG  
GTTGATTTTCTTATCAATATATAATTTAGTACCAATTTTCCAAAACTAAATAAAATATAGAATATCCACTAAGGTGTTACAG  
TGTACACTCAACCAATGACGGCACTTCAAATCTTGATAACGGTATCTCCACCTCATATATTTCAACATTTTATTGTTAAAATAA  
AATCGCACGCTCTATTTTCTAAATTTATTTATAGAATTATTAAGTATGTTATTATAATTTTTACGTATAAATATATTTCAAT  
AAAATCATATAAGTTGACATCACTAAGTTGTTGATTGTCATGTAGACCAATTTTACGATACTCAACATGACTCATTTAATATT  
GGATTATTGAAATATTTGTAATACATTAAGAATATAATTGTTAACTATTTAATTTTTAATATACGTAAATATCAAACAAAAAT  
AATATGATCGCTATATTAGATGATACTATAAGGAGCCTACACAATTAACACTATTTAACTCTATTTTGCATTTATAAAAAAGTTAC  
TTAGTCTTAGGTTCAATATGTCAAAATCTAAACAATAAAACGACGAGGAGTAAGGTTTGCACGACGATAACAAGGATTAGG  
CAACAATTAGAGTTGTGAATTGTGAGTATTACTATACTTTACTATATTAGGCAGAATTTTGCCTCAATGAGTAACTTGATTTAT  
TTATTTTTTATTTCCCTAAATTTTGGACAAGTCATATATTTGTTTTGAAAACATTTCTTTATTGGCTAAATCGAAAATTGAATCGT  
TAAAGATCAAAAATCAATAACAAATATCTTATTGGTTAACATATTTAAAAATAAAAAACCAATAAATCTAACTAATAA TATTTAAT  
ACGAAAACGAAATGGACTGACACACATTCTAAATTTTTGGTCAAAATTTTTTATAATTTCCCTAAAATCTAAAATATTAATATTT  
GACGAAAACAAAAATTCATTTTAAATAAATTTTGAAGGACTAAAACAGTGAAGAATATTTAAGAAGCTAATTTGAACCTA  
GTGCCAAATATAAAGGGACCATTTTGTCAATTTTCACTTGAATCTACGTGCTTAATATAACACCAAAGA ATTAATATTTACT  
GAAAAAATGTA AAAATGAGGATATGGATTCTGAATCACTCAATTCAGCAAAAATAAAAATAAAAATAAAAATAAAAATTT  
AAAAATAATAAATGCTATAAAAATGACAAAATGTGTGGAGCAAAAAGTGCAGAAAAACCAACAAATTGCATTCTCCATTC  
TTGGAAGTGGCCATTCTGATTTCTGAAACAAAGTTTGTTCCTTCACTTCTTGATATGTAAGTTGCAATCTTTATAACTTTCT  
ATTGCTTTGCTAGTGTTTTTGTTATACAGGGGTGGAGTTAGAGGTAAGTTACGCATTTAGTCGTAACCTTTAGTCAAACCTCGT  
AATAATTTAGTAAGTTAAAATATATTAGAAATTTTCAGAATTCATAAACTTTAATTTTTAAATTTTGACTTCGCTTTGTGACTATA  
CAATTACAGAAATTCAGAGTGGCCATTGTTGAAAGAGAGGGTGAATTTGTGAAGTTTTGTTTCTTTCACTTCTTGATATATAA  
AGTTGCAATCTTAACTTTCTTTGTTCACTTTCTATAGTTTGTAGGTTGCTGTTAAATTCAGTAGCTTTAGTTAAACCTATGCGG  
AATAGAGAATGTGAACTTTAACTTCAAATTTGGCTCCGATACGACTAGCGACTATATAATAATAGGAATTGAGCACTTGGC  
TTTTGTATATAGCTTCTATGTGTACCAAAATAGAAAATCAGGCGATTATTAATCTTGTGACTAAATATAGAATGCATCCATTAC  
CCCCAAAAGTGTGATTCCACTGTATAGGAGGTTTTTTTTATTTCAATTTATTTGTGCTTCAATAATGTAGAGTAGTTTTACAAAG  
ATCCTTTCTTTGTGACACATGGTAGGTAATATTGCTGATTTTGTGTAGTTTTGGGGTATAAAGTTTCAAATATTTACTGGAG  
GGTAGGGGTGGGGTGTCTATAATGCAGGTTATGGTTTTACGTGAACTCAATAATTATTGTAGATACTAAGAAATCCACTCAGT  
GTTCTTGCGGTGCTTGTCTTTGATTTGAGCATCACTTGTAGTTGATTGTGTTAGATTATCACATTATTCTGTGGGTGTAACGTAT  
CCTGTTAGTTGCTTTGTTTCTACACTGTTGTTTTCCCTCTTTATACCTATTTTATATGTTGACTCGAACGAGGGTATCGGGGA  
ACAACCTCTTACCTCCGTGAGGTAGAGCTATGTTCTGTGTCCACTCTACCTCCCGATCCCTCTTGTAGGATTTCACTATATTGT  
AATATTAACCTGAGGTCACTATAGGAGCTCAAAAATCTAATTTTGAATCAATGTCTGGTTATACTTTTTTTGTCATAACTGTATCT  
CAAATGTGGTGTGGTTTATCTCATTGTCAGAAAGTCAAGAAACAGTTACTCTGTTGAGTGAGGAAAAGTTGGTTGCCTGT  
CTGTGGTCTTTTTATAATCTTTTCTACAGAAGAGAAAGTGGTAAATTTGTTGAGAGTGAATAATTTCTAGTGGGAATCTACT  
AGGAGTAATTTATTTTCTATAAACTAAGTAAAGTTTGAAGGTGACAAAAGAAAGACAAAATCTTGAATTTTATAGACAACC  
AAGGTTTTCTGCTCAGAATGTCTGTTGCCTTGTTATGGGTTGTTTCTCCTGTGACGTCTCAATGGGACAAGTTTCATGGAATCA  
GTCCGGGAGGAAACCGTTTTTTTATTGATTATCGAGGCATAGGAATTTGGTGTCCAATGAGAGAATCAATAGAGGTGGTGAAGAG  
CAAATAAATGACGAAATTTTCTGTACGGTCTGCTATTTTGGCTACTCCATCTGGAGAACGACGATGACATCGGAACAGAT  
GGTCTATGATGTGTTTTGAGGCAGGCAGCCTGGTGAAGAGGCAACTGAGATCTACCAATGAGTTAGAAGTGAAGCCGGATAT  
ACCTATTCGGGGAAATTTGGGCTTGTGAGTGAAGCATATGATAGGTGTTGTTGAAGTATGTGAGAGTATGCAAAGACGTTTAAAC  
TTAGTTAGCTTCTCAATCTATTCATTCGTTTACCAAATATTATTTGGTAAGCACTAATTATGAATATATATATGTTTCATGTTATTGA  
TGAAGACAAAATTTGATCTTTGTTTATTTCAGGAACTATGCTAATGACTCCCGAGAGAAGAAAGGCTATCTGGGCAATATATG  
GTGAGGTTTCTAGCCATTTAATAACAGTTACGCGCACAAACATATGATTAATCGGGGACGAGAAAAAAGAAATGAAGTTTGA  
GTTTTGAGGGTCAATGTAATAGGTAATCCGAGCTTACTGACTGTTGAGATGTTTATTGTATATCATGCTCAATACTAACCAAAC  
ACTGAAAAGAATCTGATTATATTTACATACTAATAATTTTCAATTTGCGTTGCTGTTCAATTTTTACCTATGGAACCTGTTTTGTGA  
TTTGTATACTTCATATTCGATGTTAATAAAATATATCATTCTCCCTTTTTCTCCACTTCAAGCTTTACTGTAGTGTGAAAGGGGA

AACTCCTTTAATGATTGCATATATAAACGAACTTCTTGAGTTGAATAGTTTCTCATTATGATCTGTTAAACAGTATGGTGAGAA  
GAACAGATGAACCTGTTGATGGCCAAACGCATCATATATTACCCGGCAGCCTTAGATAGGTGGGAAAATAGGCTAGAAGATGT  
TTTCAATGGGCGGCCATTTGACATGCTCGATGGTGTCTTGTCCGATACAGTTTCTAACTTCCAGTTGATATTCAGGTTAGTCTACC  
AATTCTATGGTCTTTATATTTGTTCAATTTGCGTTTGTGATGTCACTTTGTGAGGGCTTTTCTAATAGCTTACTTCAGCCTAGCGGAA  
ATGTTTGTAGTTGAATCTCTAGTTCTGTCTCCTATATCTGTTTCTCGTCTAGATACTACACATACTTCATTTCTGTTTTAACATTTT  
ATTCGTCTTTTGGTGTGTTTTGTATGTGAATCATATATTTGGAACAGAATCATTATTAGTTCACATGATTTTCATTTGCTTTCTTCAAT  
AGCGTAATTGTCTAACCTTCCAATATATGTTGCAGCCATTAGAGATATGATTGAAGGAATGCGTATGGACTTGAGAAAATCGAG  
ATACAAAACCTTCGACGAACTATACCTTTATTGTTATTATGTTGTGCTGACGGTTGGGTTGATGAGTGTCCAATTATGGCGTGTG  
ATGAGACGAATCTGACAGGATATATTGGCGGTAACCTAAGAGAAAAGAGCGTTTATTAGAATAATCGGATATTTAAAAGGG  
CGTGAAGGTTTATCCGTTCTGTCATTTGATGTGCATGCCAACACAGGGTCCCTCGGGATCAAAGTACTTTGATCCAACCCC  
TCCGCTGTATAGTGACGTCGGCTTCTGACGTTCAAGTGCAGCCGTCATCTGAAAACGACATGTCGCACAAGTCTAAGTTACGCGA  
CAGGCTGCCGCCCTGCTTTTCTGCGGTTTTCTGTCGCGTGTGTTAGTCGCATAAAGTAGAATACTTGCAGACTAGAACCGGAG  
ACATTACGCCATGAACAAGAGCGCCGCCGCTGGCCTGCTGGGCTATGCCCGCTCAGCACCGACGACCGAGACTTGACCAACCA  
CGGGCCGAACTGCACGCGGCCGCTGCACCAAGCTGTTTTCCGAGAAGATCACCGGACCGAGCGCGACCGCCCGGAGCTGGCC  
AGGATGCTTGACCACCTACGCCCTGGCGACGTTGTGACAGTGACCAGGCTAGACCGCTGGCCCGCAGCACCCGCGACCTACTGG  
ACATTGCCGAGCGCATCCAGGAGGCCGCGCGGGCTGCGTAGCCTGGCAGAGCCGTGGGCCGACACCACCGCCGGCCGGC  
CGCATGGTGTGACCGTGTTCGCGGCATTGCCGAGTTCGAGCGTCCCTAATCATCGACCGCACCCGGAGCGGGCGGAGGCCG  
CCAAGGCCCGAGGCGTGAAGTTTGGCCCCGCTACCTCACCCGGCACAGATCGCGCACGCCCGGAGCTGATCGACCAGGA  
AGGCCGACCGTGAAGAGGCGGCTGCACTGCTTGGCGTGCATCGCTCGACCTGTACCGCGCACTTGCAGCGAGGAAAGT  
GACGCCACCGAGGCCAGGCCGCGCGTGCCTCCGTGAGGACGATTGACCGAGGCCGACCGCTGGCGCCGCGAGAATG  
AACGCCAAGAGGAACAAGCATGAAACCGACCGAGCGGCCAGGACGAACCGTTTTTCTTACCAGAGATCGAGGCCGAGAT  
GATCGCGCGCGGTACGTGTTGAGCCGCCGCGCACCTCTCAACCGTGCGGTGCATGAAATCTGGCCGGTTTTGTCTGATGCC  
AAGCTGGCGGCTGGCCGGCAGCTTGGCCGTGAAGAAACCGAGCGCCCGCTAAAAAGGTGATGTGATTTGAGTAAAAAC  
AGCTTGCATGCGTCTGCTGATATGATCCGATGAGTAATAAACAAATACGCAAGGGGAACGCATGAAGTTATCGCTGT  
ACTTAACAGAAAGGCGGTCAGGCAAGACGACCATCGAAACCATCTAGCCCGCCCTGCAACTCGCCGGGGCGATGTTCT  
GTTAGTCGATTCCGATCCCGAGGCGAGTCCCGCGATTGGGCGGCCGTGCGGGAGATCAACCGCTAACCGTTGTCGGCATCGA  
CCGCCGACGATTGACCGCGACGTGAAGGCCATCGGCCGCGCGACTTCTGATGATCGACGAGCGCCCGAGCGCGGACTT  
GGCTGTGTCGCGATCAAGGCGCCGACTTCTGCTGATTCCGGTGCAGCCAAGCCCTTACGACATATGGGCCACCGCCGACCTG  
GTGGAGCTGTTAAGCAGCGCATTGAGTGCAGGATGGAAGGCTACAAGCGCCTTTGTCGTGTCGCGGGCGATCAAAGGCAG  
CGCATCGGCGGTGAGGTTCCGAGGCGCTGGCCGGTACGAGCTGCCATTCTTGAAGTCCCGTATCACGCGCGCTGAGCTAC  
CCAGGCACTGCCGCCCGGCAACCGTTCTGAATCAGAACCCGAGGGCGACGCTGCCCGGAGGTCCAGGCGCTGGCCGCT  
GAAATTAATCAAACTCATTGAGTTAATGAGGTAAGAGAAAATGAGCAAAAGCACAAACAGCTAAGTGCCGGCCGTCCGA  
GCGCACGAGCAGCAAGGCTGCAACGTTGGCCAGCCTGGCAGACCGCCAGCCATGAAGCGGTTCAACTTTCAGTTGCCGGCG  
AGGATCACACCAAGCTGAAGATGTACGCGGTACGCCAAGGCAAGACCATACCGAGCTGCTATCTGAATAGATCGCGCAGTACC  
AGAGTAAATGAGCAAATGAATAAATGAGTAGATGAATTTAGCGGCTAAAGGAGCGGCATGAAAATCAAGAACAACAGGC  
ACCGACGCCGTGAATGCCCCATGTGTGGAGGAACGGGCGGTTGGCCAGGCGTAAGCGGCTGGGTTGCTGCGGCCCTGCAAT  
GGCACTGGAACCCCAAGCCCGAGGAATCGGCGTGACGGTGCAGCAACCATCCGGCCCGTACAAATCGGCGCGGCGCTGGGTG  
ATGACCTGGTGGAGAAGTTGAAGGCCGCGCAGGCCGCCAGCGCAACGCATCGAGGCAGAAGCACGCCCCGTTGAATCGTGG  
CAAGCGCCGCTGATCGAATCCGCAAAGAATCCCGCAACCGCCGCGCAGCCGTTGCGCGTGCATTAGGAAGCCGCCAAGGGC  
GACGAGCAACAGATTTTTCTGTTCCGATGCTCTATGACGTGGCACCCCGATAGTCGAGCATCATGGACGTGGCCGTTTTCCG  
TCTGTGAAGCGTGACCGACGAGCTGGCGAGGTGATCCGCTACGAGCTTCCAGACGGGCAGTAGAGTTTTCCGAGGGCCGGC  
CGGCATGGCAGTGTGTTGGATTACGACCTGGTACTGATGGCGTTTTCCATCTAACCAATCCATGAACCGATACCGGGAAGGG  
AAGGGAGACAAGCCCGCCGCTGTTCCGTCACACGTTGCGGACGTAACAAGTTCTGCCGGCGAGCCGATGGCGGAAAGCAG  
AAAGACGACCTGGTAGAAACCTGCATTCCGTTAAACACCGCACGTTGCCATGACGCTACGAAGAAGGCCAAGAACGCCGC  
CTGTTGACGGTATCCGAGGTTGAAGCCTTATTAGCCGCTACAAGATCGTAAAGAGCGAAACCGGGCGCCGGAGTACATCGAG  
ATCGAGCTAGCTGATTGATGTACCGGAGATCACAGAAGGCAAGAACCCGGACGTGCTGACGGTTACCCCGATTACTTTTTGA  
TCGATCCCGCATCGGCCGTTTTCTACCGCCTGGCACGCCGCGCCGAGGCAAGGCAGAAGCCAGATGTTGTTCAAGACGAT  
CTACGAACGCAGTGGCAGCGCCGAGAGTTCAAGAAGTTCTGTTTACCGTGCGAAGCTGATCGGGTCAAATGACCTGCCGGA  
GTACGATTTGAAGGAGGAGGCGGGCAGGCTGGCCGATCCTAGTCATGCGCTACCGCAACCTGATCGAGGGCGAAGCATCCG  
CGGTTCTAATGTACGGAGCAGATGCTAGGGCAAATGCCCCAGAGGGGAAAAGGTCGAAAAGGACTCTTCTGTGGATAG  
CACGTACATTGGGAACCAAGCCGTACATTGGGAACCGGAACCGTACATTGGGAACCAAGCCGTACATTGGGAACCGGTC

ACACATGTAAGTGACTGATATAAAAAGAGAAAAAAGGCGATTTTTCCGCCTAAAACCTCTTAAAACTTATAAAACTCTTAAAAACC  
GCCTGGCCTGTGCATAACTGTCTGGCCAGCGCACAGCCGAAGAGCTGCAAAAAGCGCCTACCCTTCGGTGCCTGCGCTCCCTACG  
CCCCCGCTTCGCGTCCGCTATCGCGGCCGCTGCGCTCAAAAATGGCTGGCTACGGCCAGGCAATCTACCAGGGCGCGGA  
CAAGCCGCGCCGTCGCACTCGACCGCCGCGCCACATCAAGGCACCCTGCTCGCGCTTCGGTGATGACGGTAAAACTC  
TGACACATGCAGCTCCCGGTGACGGTCACAGCTTGTCTGTAAGCGGATGCCGGAGCAGACAAGCCCGTCAGGGCGCTCAGCG  
GGTGTGGCGGGTGTGGGGCGCAGCCATGACCCAGTACGTAGCGATAGCGGAGTGTACTGGCTTAACTATGCGGCATCAG  
AGCAGATTGTAAGTGTGACCATATGCGGTGTGAAATACCCACAGATGCGTAAGGAGAAAATACCCATCAGGCGCTCTC  
CGCTTCTCGCTCACTGACTCGCTGCGCTCGGTCTCGCTGCGGCGAGCGGTATCAGCTCACTCAAAGCGGTAATACGGTTAT  
CCACAGAATCAGGGGATAACGCAGGAAAGAACATGTGAGCAAAAAGCCAGCAAAAAGGCCA GGAACCGTAAAAAGGCCGCTTG  
CTGGCGTTTTCCATAGGCTCCGCCCCCTGACGAGCATCACAAAATCGACGCTCAAGTCAGAGGTGGCGAAACCCGACAGGAC  
TATAAGATAACCAGGCGTTCCCTGGAAGCTCCCTGTGCGCTCTCTGTTCCGACCTGCCGTTACCGGATACCTGTCGCT  
TTCTCCCTCGGGAAGCGTGGCGCTTCTCATAGCTCAGCTGTAGGTATCTCAGTTCGGTGTAGGTGCTTCCGCTCAAGCTGGG  
TGTGTGCAGAAACCCCGTTCAGCCGACCGCTGCGCTTATCCGGTAACTATCGTCTTGAGTCCAACCCGTAAGACACGACTT  
ATCGCCACTGGCAGCAGCCACTGGTAACAGGATTAGCAGAGCGAGGTATGTAGGCGGTGCTACAGAGTCTTGAAGTGGTGGCC  
TAACTACGGCTACACTAGAAGGACAGTATTTGGTATCTGCGCTCTGCTGAAGCCAGTTACCTTCGAAAAAGAGTTGGTAGCTCTT  
GATCCGGCAAAACAAACCACCGCTGGTAGCGGTGGTTTTTTTGTGCAAGCAGCAGATTACGCGCAGAAAAAAGGATCTCAAGA  
AGATCCTTTGATCTTTTCTACGGGTCTGACGCTCAGTGAACGAAAACCTCACGTTAAGGGATTTGGTATGCATTCTAGGTGAT  
TAGAAAAACTCATCGAGCATCAAATGAACTGCAATTTATTCATATCAGGATTATCAATA CCATATTTTAAAAAGCCGTTTCTGT  
AATGAAGGAGAAAACTACCGAGGCAGTTCATAGGATGGCAAGATCCTGGTATCGGTCTGCGATTCCGACTCGTCCAACATCAA  
TACAACCTATTAATTTCCCTCGTCAAAAATAAGGTTATCAAGTGAGAAATCACCATGAGTGACGACTGAATCCGGTGAGAATGGC  
AAAAGTTTATGCATTTCTTCCAGACTTGTCAACAGGCCAGCCATTACGCTCGTCAT CAAAATCACTCGCATCAACCAACCGTTA  
TTCATTCGTGATTGCGCCTGAGCGAGTCGAAATACGCGATCGCTGTTAAAAGGACAATTACAAACAGGAATCGAATGCAACCGGC  
GCAGGAACACTGCCAGCGCATCAACAATATTTTCACTGAATCAGGATATTCTTCTAATACCTGGAATGCTGTTTTCCCTGGGATCG  
CAGTGGTGAGTAACCATGCATCATCAGGAGTACGATAAAATGCTTGTGTCGG AAGAGGCATAAATTCGTCAGCCAGTTTAG  
TCTGACCATCTCATCTGTAACATCATTGGCAACGCTACCTTGCATGTTTCAGAAACAACCTGCGCGCATCGGGCTTCCATACAA  
TCGGTAGATTGTGCACTGATTGCCGACATTATCGCGAGCCATTTATACCCATATAAATCAGCATCCATGTTGGAATTTAATCG  
CGGCCTTGAGCAAGACGTTTCCGTTGAATATGGCTCATAACAGAACCTATT ATTTCTTCTCTTTTCTACAGTATTTAAAGATACC  
CCAAGAAGCTAATTATAACAAGACGAACTCCAATTCAGTTCCTTGCATTCTAAAACCTTAAATACCAGAAAACAGCTTTTTCAA  
GTTGTTTTCAAAGTTGGCGTATAACATAGTATCGACGAGCCGATTTTGAACCCGCGGTGATCACAGGCAGCAACGCTCTGTATC  
GTTACAATCAACATGCTACCTCCGCGAGATCATCCGTGTTTCAAACCCGCGCAGCTTAGTTGCCGTTCTCCGAATAGCATCGGTAA  
CATGAGCAAAGTCTGCCGCTTACAACGGCTCTCCGCTGACGCGTCCCGGACTGATGGGCTGCCTGTATCGAGTGGTGATTTTG  
TGCCGAGCTGCCGTCGGGGAGCTGTTGGCTGGCTGGTGGCAGGATATATTGGTGTAAACATAACGAATTCGTCTCA

>R2

GGAGCAACCTATTTTGTACTTTAAAAAATTCATTTTTTTTATTTTTCGACTTTAAAGCCAAAATTATCCTTTATTTATGAAAGTGA  
TGTATTTTATCCCTTAATATAAGGTTGAGTTTTCTTTAAGTTTGAATGTTAAGTGGGGCACTTTATATTAGTCCAATTAACAGAA  
TTGACTTAGAAATTGATGGCGATTACTTGAAAAATCGCTACAAAAACATAATAAAATAAAATTTTCATTTGATTTTTAAACCAAAG  
AAAAGTGACATGACTAACGATTTGATCCATCTCTTTTTTTTTAAGAAAAAATTAAGAAAAATTTTAAACTGGATGATTA  
ATTTAACATAAAAAATAAAAAATAAAAAATCAATCGAGCTCACTATTTGATATTATTATTTTTCATCTTGATATTGTTACTTCATATCA  
CTGAATTATAAAATGCGTAAACGCAATTATCATAGACGCACTGAAAGCATAAAATTAACAATTTCCATTTTTGTTTTTTTTTTG  
CCAACCAAAAAAATAATAATTTATTTACATAATTATAGAAAAATTGGAATTTATTCATGTTTTTGACCATTAGATAACCCAC  
AATAAAAAAAGTGCACAAAAGTGCAAAAGTGTACGTGCTCAATTATAGCCATACTACATTTGTGCATAAAATAGCCACCATT  
ATTTTTAAGATTATTTCTTTTCTGTTTTAATTTATATGCCACACTTTCTTATTAATCCATCTTAAACAGAATGACACACTTTTTATTTG  
ACAAATATTTAATGACATTATTAACATTTTATCCTCGTTAGATTTCACTATGCGGAATAGAGAATGTGTAACCTTAAACTTCAAAT  
TTGGCTCCGCATACGACTAGCGACTATATAATAATAGGAATTGAGCACTTGGCTTTTGTATATAGCTTCTATGTGTACCAAAATTAG  
AAAATCAGGCGATTATTAATCTTGTGACTAAATATAGAATGCATCCATTACCCCAAAAAGTGTGATTCCACTGTCATAGGAG  
GTTTTTTTTATTTCAATTTATTTGTCTTCAATAATGTAGAGTAGTTTTACAAGATCCTTTCTTTGTGACACATGGTAGGTAATATT  
GCTGATTTTGTGTAGTTTTGGGGTTATAAAGTTTCAAATTTTATACTGGAGGTAGGGGTGGGGTGTCTATAATGCAGGTT  
ATGGTTTTACGTGAACTCAATAATTATTGTAGATACTAAGAAATCCACTCAGTGTCTTTCGGGTGCTTGTCTTTGATTTTCAGCATCA  
CTGTAGTTGATTGTGTTAGATTATCACATTATCTGTGGCTGTAAGTGTATCCTTGTAGTTGCTTTGTTTCTACACTGTTGTTTTT

CCTCTTTTATACCTATTTTGATATGTTGTA CTACTCGAACGAGGGTCATCGGGGAACAACCTCTTACCTCCGTGAGGTAGAGCTATGGT  
CTGTGTCCACTCTACCCTCCCAGATCCCTCTGTAGGATTTCACTATATTGTAATATTAACCTGAGGTCACTATAGGAGCTCAAAAA  
CTTCAATTTTGAATCAATGTCTGGTTATACTTTTTTGTCTAACTGTATCTCAAATGTGGTGGTTTGGTTATCTCATTTTGCAGAAG  
TCAAGAAACAGGTTACTCCTGTTGAGTGAGGAAAAGTTGGTTGCTGTCTGTGGTCTTTTTATAATCTTTTTCTACAGAAGAGAA  
AGTGGGTAATTTTGGTTGAGAGTGGAAATATTCTCTAGTGGGAATCTACTAGGAGTAATTTATTTTCTATAAACTAAGTAAAGTTT  
GGAAGGTGACAAAAAGAAAGACAAAAATCTTGAATTGTTTTAGACAACCAAGTTTTCTTGCTCAGAATGTCTGTTGCCTTGTTA  
TGGGTTGTTTTCTCTGTGACGTCTCAAATGGGACAAGTTTCATGGAATCAGTCCGGGAGGAAAACCGTTTTTTTTGATTTCATCGAG  
GCATAGGAATTTGGTGTCCAATGAGAGAATCAATAGAGGTGGTGGAAAGCAAATAAATGGACGGAAATTTTCTGTACG GTCT  
GCTATTTTGGCTACTCCATCTGGAGAACGGACGATGACATCGGAACAGATGGTCTATGATGTGGTTTTGAGGCAGCAGCCTTGG  
TGAAGAGGCCAAGTCTACCAATGAGTTAGAAGTGAAGCCGGATATACCTATTCGGGGAAATTTGGGCTTGTGAGTGAAG  
CATATGATAGGTGTGGTGAAGTATGTGCAGAGTATGCAAAGACGTTAACTTAGGTTAGCTTCTTCAATCTATTCAATCGTTT ACCA  
AATATTATTTGGTAAGCACTAATTATGAATATATATGTTTCATGTTATTGATGAAGACAAAATTTGATCTTTGTTTGTATTTCAGG  
AACTATGCTAATGACTCCCGAGAGAAGAAGGGCTATCTAGGCAATATATGGTGAGGTTTCTAGCCATTTAATAACAGTTACGCGC  
ACAAACACATATGATTAATCGGGGACGAGAAAAAAGAAATGAAGTTTGGAGTTTGGAGGGTCATATGTAATAGGTAAAT CCGAG  
CTTGACTAGCTTGAGATGTTTATTGTATATCATGCTCAATACTAACCAAAACACTGAAAAAGAACTTGATTATATTACATACTAA  
TATTTTCATTTGCGTTGCTGTTACATTTTTACCTATGGAAGTGGTTTTTGTGATTTGTTATACCTTCATATTGATGTTAATAAAATAT  
ATCATTCTCCCTTTTTCTCCACTTCAAGCTTTACTGTAGTGTGAAAGGGGAAACTCTTTTAATGATTGCATA TATAAACGAACCTT  
CTTGAGTTGAATAGTTTCTCATTATGATCTGTTAAACAGTATGGTGCAGAAGAACAGATGAACCTGTTGATGGCCAAACGCATC  
ATATATTACCCCGCAGCCTTAGATAGGTGGGAAAATAGGCTAGAAGATGTTTTCAATGGGCGGCCATTTGACATGCTCGATGGT  
GCTTTGCCGATACAGTTTCTAACTTTCCAGTTGATTTACAGTTAGTCTACCAATCTATGGTCTTTATATTTGTTCAATTTGCGTTT  
GATGCTACTTTTGTGAGGGCTTTTCTAATAGCTTACTTCAGCCTAGCGAAATGTTTGTAGTTGAATCTAGTTCTGTCTCTATA  
TCTGTTTCTCTCGTCTAGATACTACACATACTTCATTTCTGTTTTAACATTTTTATTCTGTTTTTGGTGGTTTGTATGTGAATCATA  
TATTTGGAACAGAATCATTATTAGTTACATGATTTTCTTTCTTCAATAGCGTAATTGCTAACCTTCCAATATATGTTGCAG  
CCATTGAGAGATGATTGAAGGAATGCGTATGGACTTGAGAAAATCGAGATACAAAACTTCGACGAACTATACCTTTATTGTTA  
TTATGTTGCTGGTACGTTGGGTTGATGAGTGTCCAATTATGGCGTGTCTATGAGACGAATTCTGACAGGATATATTGGCGGGT  
AAACCTAAGAGAAAAGAGCGTTTATTAGAATAATCGGATATTTAAAAGGGCGTGAAAA GTTTATCCGTTCTCCATTTGTATGTG  
CATGCCAACCCAGGGTCCCTCGGGATCAAAGTACTTTGATCCAACCCCTCCGCTGCTATAGTGAGTCCGCTTCTGACGTTCA  
GTGCAGCCGTCTGAAAACGACATGTGCGACAAGTCTAAGTTACGCGACAGGCTGCCGCCCTGCCCTTTCTGGCGTTTTCT  
TGTCGCGTGTTTTAGTCGCATAAAGTAGAATACTTGCAGTGAACCGGAGACATTACGCCATGAACAAGAGCGCCGCGCTGGC  
CTGCTGGGCTATGCCCGCTCAGCACCGACGACTTGACCAACCAACGGCCGAACCTGCACGCGCCGGCTGCACCAAG  
CTGTTTTCCGAGAAGATCACCGGACCGAGCGCGACCGCCGGAGCTGGCCAGGATGCTTGACCACCTACGCCCTGGCGAGCTTG  
TGACAGTGACCAGGCTAGACCGCTGGCCCGCAGCACCCGACCTACTGGACATTGCCGAGCGCATCCAGGAGGCCGCGCGG  
GCCCTGCGTAGCCTGGCAGAGCCGTGGCCGACACCACCGCCGGCCGCGCATGGTGTGACCGTGTTCGCGCGCATTGCCG  
AGTTGAGCGTTCCCTAATCATCGACCGCACCCGAGCGGGCGGAGGCGCCGAAGGCCCGAGGCGTGAAGTTTGGCCCCGCC  
CTACCCTCACCCGGCACAGATCGCGCACGCCGCGAGCTGATCGACCAGGAAGGCCGACCCGTGAAAGAGGCGGCTGCACTGC  
TTGGCGTGCATCGCTCGACCTGTACCGCGCACTTGAGCGCAGCGAGGAAGTGACGCCACCGAGCCAGGCGGCGCGGTGCTT  
TCCGTGAGGACGCATTGACCGAGGCGACGCCCTGGCGGCCGCGGAGAATGAACGCCAAGAGGAACAAGCATGAAACCGCACC  
AGGACGGCCAGGACGAACCGTTTTTCAATACCGAAGAGATCGAGGCGGAGATGATCGCGGCCGGTA CGTGTTCGAGCCGCCCC  
CGCACCTCAACCGTGGCGTGCATGAAATCTGGCCGTTTTGTCTGATGCCAAGCTGGCGCCTGGCCGGCCAGCTTGCCGC  
TGAAGAAACCGAGCGCCCGCTCTAAAAGGTGATGTGATTTGAGTAAAACAGCTTGCCTCATGCGTCTGCGTATATGATC  
CGATGAGTAAATAAACAATAACGCAAGGGGAACGCATGAAGTTATCGCTGTACTTAACCAGAAAGGCG GGTGAGCAAGACGA  
CCATCGAAACCCATCTAGCCCGCCCTGCAACTCGCCGGGCGGATGTTCTGTTAGTTCGATTCCGATCCCCAGGGCAGTGCCCCG  
GATTGGGCGGCCGTGCGGGAAGATCAACCGTAACCGTTGTCGGCATCGACCGCCGACGATTGACCGGACGTGAAGGCCATC  
GGCCGCGCGACTTCGTAGTGATCGACGAGCGCCCGAGGCGGCGACTTGCTGTGTCGCGATCAAGGCAGCCGACTTCGTG  
CTGATTCCGGTGCAGCCAAGCCCTTACGACATATGGGCCACCGCCGACTGGTGGAGCTGGTTAAGCAGCGCATTGAGGTACGG  
ATGGAAGGCTACAAGCGCCTTTGTCGTGTGCGGGCGATCAAAGGCACGCGCATCGGCGTGTGAGTTGCCGAGGCGCTGGCC  
GGGTACGAGCTGCCATTCTTGTAGTCCCGTATCACGACGCGTGTGAGCTACCCAGGCACTGCCGCCCGGCACAACCGTTCTT  
AATCAGAACCCGAGGGCGACGCTGCCCGGAGGTCCAGGCGCTGGCCGCTGAAATTAATCAAACTCATTTGAGTTAATGAGG  
TAAAGAGAAAATGAGCAAAAGCACAACACGCTAAGTGGCGCCGTCAGGCGCACGCGAGCAAGGCTGCAACGTTGGCCA  
GCCTGGCAGACACGCCAGCCATGAAGCGGGTCAACTTTCAGTTGCCGGCGGAGGATCACACCAAGCTGAAGATGTACGCGGTAC  
GCCAAGGCAAGACCATTACCGAGCTGCTATCTGAATAGATCGCGCAGCTACCAGAGTAAATGAGCAAATGAATAAATGAGTAGAT

GAATTTAGCGGCTAAAGGAGGCGGCATGAAAATCAAGAACAACCAGGCACCGACGCCGTGGAATGCCCCATGTGTGGAGGA  
ACGGGCGGTTGGCCAGGCGTAAGCGGCTGGTTGTCTGCCGCCCTGCAATGGCACTGGAACCCCAAGCCCGAGGAATCGGCG  
TGACGGTGC AAAACCATCCGCGCCGGTACAAATCGGCGGCGCTGGGTGATGACCTGGTGGAGAAGTTGAAGGCCGCGCAGG  
CCGCCAGCGCAACGCATCGAGGCAGAAGCACGCCCGGTGAATCGTGGCAAGCGGCCGCTGATCGAATCCGCAAAGAATCCC  
GGCAACCGCCGGCAGCCGTGCGCCGTGATTAGGAAGCCGCCAAGGGCGACGAGCAACCAGATTTTTTCTTCCGATGCTCTA  
TGACGTGGCACCCGCGATAGTCGACGATCATGACGTGGCCGTTTTCCGTCTGTGCAAGCGTGACCGACGAGCTGCGGAGGT  
GATCCGCTACGAGCTTCCAGACGGGCACGTAGAGTTTTCCGACGGCCGGCCGCATGGCCAGTGTGTGGATTACGACCTGGT  
ACTGATGGCGGTTCCCATCTAACCGAATCCATGAACCGATAACGGGAAGGGAAGGGAGACAAGCCCGCCGCGTGTCCGTCC  
ACACGTTGCGGACGTACTCAAGTTCTGCCGCGAGCCGATGGCGGAAAAGCAGAAAAGACGACCTGGTAGAACCTGCATTGCGTT  
AAACACCAGCACGTTGCCATGCAGCGTACGAAGAAGGCCAAGAACGGCCGCTGGTGACGGTATCCGAGGGTGAAGCCTTGAT  
TAGCCGCTACAAGATCGTAAAGAGCAAACCGGGCGGCCGGAGTACATCGAGATCGAGCTAGCTGATTGGATGTACCGCGAGAT  
CACAGAAGGCAAGAACCCGGACGTGCTGACGTTACCCCGATTACTTTTTGATCGATCCCGGCATCGGCCGTTTTCTACCCGC  
TGGCACGCCGCGCCGAGGCAAGGCAGAAGCCAGATGGTTGTTCAAGACGATCTACGAACGAGTGCGCAGCGCCGGAGAGTTC  
AAGAAGTTCTGTTTACCCTGCGCAAGCTGATCGGGTCAAATGACCTGCCGAGTACGATTTGAAGGAGGAGGCGGGGAGGCT  
GGCCGATCCTAGTCATGCGCTACCCCAACCTGATCGAGGGCGAAGCATCCGCCGTTCTAATGTACGGAGCAGATGCTAGGGC  
AAATTGCCCTAGCAGGGGAAAAGGTGAAAAGGACTCTTCTGTGGATAGCACGTACATTGGGAACCCAAAGCCGTACATTG  
GGAACCGGAACCCGTACATTGGGAACCAAAGCCGTACATTGGGAACCGGTACACATGTAAGTGACTGATATAAAGAGAAAA  
AAGGCGATTTTTCCGCTAAAACCTTTAAAACCTTATAAAAACCTTAAAACCCGCTGGCCTGTGCATAACTGTCTGGCCAGCGCA  
CAGCCGAAGAGCTGAAAAAGCGCCTACCCTTCGGTCTGCTGCTCCCTACGCCCGCGCTTCCGCTCGGCTATCGCGCCGC  
TGGCCGCTCAAAAATGGCTGCTGCTACGCCAGGCAATCTACCAGGGCGCGGACAAGCCGCGCCGTCGCACTCGACCGCCGGCG  
CCCACATCAAGGCACCCTGCTCGCGTTTTCGGTGATGACGGTGAAAACCTCTGACACATGCAGCTCCCGGTGACGGTACAGC  
TTGTCTGTAAGCGGATGCCGGAGCAGACAAGCCGTCAGGGCGCGTCAGCGGGTGGCGGGTGGCGGGCGCAGCCATGA  
CCAGTCACGTAGCGATAGCGGAGTGTATACTGGCTAACTATGCGGCATCAGAGCAGATTGTACTGAGAGTGCACCATATGCGG  
TGTGAAATACCGCACAGATGCGTAAGGAGAAAATACCGCATCAGGCGCTTCCGCTTCTCGCTCACTGACTCGTCTCGCTCGGT  
CGTTCGGCTGCGGCGAGCGGTATCAGCTCACTCAAAGGCGTAATACGTTATCCACAGAATCAGGGGATAACGAGGAAAAGAA  
CATGTGAGCAAAGGCCAGCAAAGGCCAGGAACCGTAAAAGGCCGCGTTGCTGGCGTTTTTCCATAGGCTCCGCCCCCTGAC  
GAGCATCACAAAATCGACGCTCAAGTCAGAGTGGCGAAACCCGACAGGACTATAAAGATACCAGGCGTTTCCCTCGGAAGC  
TCCCTCGTGGCTCTCTGTTCCGACCTGCCGTTACCGGATACCTGTCCGCTTCTCCCTCGGAAGCGTGGCGTTTCTCATA  
GCTCAGCTGTAGGTATCTCAGTTCGGTGTAGGTGTTGCTCCAAGCTGGGCTGTGTGCACGAACCCCGTTAGCCCGACCCG  
TGCGCTTATCCGTAACCTATCGTCTTGAGTCCAACCCGTAAGACGACTTATCGCACTGGCAGCAGCCACTGGTAACAGGAT  
TAGCAGAGCGAGGTATGTAGGCGGTCTACAGAGTCTTGAAGTGGTGCCCTAACTACGGCTACACTAGAAGGACAGTATTGG  
TATCTGCGCTGTGTAAGCCAGTTACCTTCGGAAAAGAGTTGGTAGCTTGTGATCCGGCAAACAACCACCGCTGGTAGCGGT  
GGTTTTTTGTTTGAAGCAGCAGATTACGCGCAGAAAAAAGGATCTCAAGAAGATCCTTTGATCTTTTACGGGGTGTGACGC  
TCAGTGAACGAAAACCTCACGTTAAGGGATTTTGGTCATGCATTCTAGGTGATTAGAAAAACTCATCGAGCATCAAATGAAAAC  
CAATTTATTCATATCAGGATTATCAATACCATATTTTTGAAAAGCCGTTTCTGTAATGAAGGAGAAAACCTCACCGAGGCGATTCCA  
TAGGATGGCAAGATCCTGTTATCGGTCTGCGATTCCGACTCGTCCAACATCAATACAACCTATTAATTTCCCTCGTCAAAAATAAG  
GTTATCAAGTGAGAAATCACCATGAGTGACGACTGAATCCGGTGAGAATGGCAAAGTTTATGATTTCTTCCAGACTTGTCAA  
CAGGCCAGCCATTACGCTCGTCATCAAATCACTCGCATCAACCAAACCGTTATTCATTGATGCGCCTGAGCGAGTCGAAAT  
ACGCGATCGCTGTTAAAAGGACAATTACAAAAGGAATCGAATGCAACCGGCGCAGGAACACTGCCAGCGCATCAACAATATTTT  
CACCTGAATCAGGATATTCTTAATACCTGGAATGCTTTTTCCCTGGGATCGCAGTGGTGAAGTAAACCATGCATCATCAGGAGTA  
CGGATAAAATGCTTATGTTGCGGAAGAGGCATAAATCCGTCAGCCAGTTAGTCTGACCATCTCATCTGTAACATCATTGGCAAC  
GCTACCTTTGCCATGTTTCAAGAAACCTCTGGCGCATCGGGCTCCCATACAATCGGTAGATTGTCGCACCTGATTGCCCGACATT  
ATCGCGAGCCATTATACCCATATAAATCAGCATCCATGTTGGAATTAATCGCGCCTGAGCAAGACGTTTCCCGTTGAATATG  
GCTCATAACAGAACTATTATTTCTTCTTTCTACAGTATTTAAAGATACCCCAAGAAGCTAATTATAACAAGACGAACTCCAA  
TTCACTGTTCTTGCATTCTAAAACCTTAAATACCAGAAAACAGCTTTTTCAAAGTTGTTTTCAAAGTTGGCGTATAACATAGTATCG  
ACGGAGCCGATTTTGAACCCGCGGTGATCACAGGCGACGCAACGCTGTGCATCGTTACAATCAACATGCTACCTCCGCGAGATCAT  
CCGTGTTTCAAACCCGCGAGCTTAGTTGCCGTTCTCCGAATAGCATCGGTAACATGAGCAAAGTCTGCCGCTTACAACGGCTCT  
CCCGTACGCCGTCGCCGACTGATGGGCTGCTGATCGAGTGGTGTATTTGTGCCGAGCTGCCGGTGGGAGCTGTTGGCTG  
GCTGGTGGCAGGATATTTGGGTGTAACATAACGAATTCGTCTCA
